1 March 18, 2020

2

3 **Decoupling gene knockout effects from gene functions by evolutionary analyses**

4

5 Li Liu<sup>#</sup>, Mengdi Liu<sup>#</sup>, Di Zhang, Shanjun Deng, Piaopiao Chen, Jing Yang, Yunhan Xie

6 & Xionglei He

7

8 State Key Laboratory of Biocontrol, School of Life Sciences, Sun Yat-sen University,

9 Guangzhou 510275, China

10

11 <sup>#</sup> These authors contributed equally to this work.

12 <sup>\*</sup> Correspondence should be addressed to X.H. ([hexiongl@mail.sysu.edu.cn](mailto:hexiongl@mail.sysu.edu.cn)).

13

14

15

16

17

18

19

20

21

22

23

24

25

26

27

28

29

30

31

32

## 33 **Abstract**

34       Genic functions have long been confounded by pleiotropic mutational effects.  
35       To understand such genetic effects, we examine HAP4, a well-studied transcription  
36       factor in *Saccharomyces cerevisiae* that functions by forming a tetramer with HAP2,  
37       HAP3, and HAP5. Deletion of HAP4 results in highly pleiotropic gene expression  
38       responses, some of which are clustered in related cellular processes (clustered effects)  
39       while most are distributed randomly across diverse cellular processes (distributed  
40       effects). Strikingly, the distributed effects that account for much of HAP4 pleiotropy  
41       tend to be non-heritable in a population, suggesting they have little evolutionary  
42       consequences. Indeed, these effects are poorly conserved in closely related yeasts.  
43       We further show substantial overlaps of clustered effects, but not distributed effects,  
44       among the four genes encoding the HAP2/3/4/5 tetramer. This pattern holds for  
45       other biochemically characterized yeast protein complexes or metabolic pathways.  
46       Examination of a set of cell morphological traits of the deletion lines yields consistent  
47       results. Hence, only some gene deletion effects support related biochemical  
48       understandings with the rest being pleiotropic and evolutionarily decoupled from the  
49       gene's normal functions.

50

## 51 **Introduction**

52       Mutation analysis has long been used to understand the functions of a gene(1). It  
53       appears now clear that a gene can often affect various seemingly unrelated traits(2), a  
54       phenomenon termed pleiotropy(3). For instance, a large-scale gene knockdown assay

55 in the nematode worm *Caenorhabditis elegans* finds on average a gene affects ~10%  
56 of 44 assessed traits(4). Attempts to understand such pleiotropic mutational effects  
57 are mainly from mechanistic perspectives(5, 6), by considering the focal gene's  
58 multiple molecular functions or multiple cellular processes associated with a single  
59 molecular function(7). The resulting pictures are, however, often complex, confusing  
60 our understandings in how a gene functions.

61 Since biological systems are all evolutionary products with history, mechanistic  
62 perspectives alone may bias the efforts for delineating a biological phenomenon(8, 9).  
63 This is exemplified by the debates on the ENCODE project in which up to 80% of the  
64 human genome was claimed to be functional despite that only 10% appears to be under  
65 selection(10-12). A simple example explains how the confusion arose. Suppose  
66 there is a transcription factor (TF) that recognizes a DNA motif, say, ATCGATC. The  
67 human genome with  $\sim 3 \times 10^9$  base pairs in length contains over one hundred thousand  
68 ATCGATC motif sequences, some of which are evolutionarily selected for certain  
69 biological processes while the rest exist as *ad hoc* entities due to the equilibrium of  
70 random mutations in such a long genome(11). From a purely mechanistic perspective  
71 originally adopted by the ENCODE consortium(10), the myriad ATCGATC sequences  
72 are all called functional so long as they are bound by the TF. However, the claim of  
73 *ad hoc* entities as functional would only confuse our understandings in how the system  
74 is organized to function. Such confusions forced the ENCODE consortium to  
75 eventually abandon their evolution-free view on biochemical functionality(13).  
76 Notably, the same problem actually also applies to the genetic effects defined in reverse

77 genetics analysis. The common practice is to knockout or knockdown a gene and find  
78 the traits significantly altered(14), which represents a purely mechanistic framework.  
79 In the above TF versus ATCGATC motif example, when the TF is deleted, the  
80 expression of those genes with the motif at promoter region could all be affected. The  
81 resulting pleiotropic effects, which are either *ad hoc* or evolutionarily selected  
82 according to the nature of the focal motifs, together would lead to a very complex  
83 picture on the functionality of the TF.

84 The necessity of adopting an evolutionary view in reverse genetic analysis lies also  
85 in the effect size of the knockout or knockdown mutations experimentally introduced,  
86 which is much larger than that of typical segregating alleles in natural populations(15).  
87 Hence, while the normal functions of a gene is necessarily built by natural selection,  
88 responses to such experimental inactivation of the functions may not be shaped by  
89 evolution(16). Then, how can the “non-evolutionary” responses be in line with the  
90 evolutionarily selected gene functions? With this question in mind we here examine  
91 the evolutionary nature of a set of gene deletion effects. We show widespread  
92 decoupling of gene deletion effects from the gene’s normal functions, calling for an  
93 evolutionary framework for reverse genetic analysis.

94

## 95 **Results**

96 We started with a known yeast *Saccharomyces cerevisiae* gene HAP4(17). It is a  
97 non-essential transcription factor that has been subjected to extensive studies since its  
98 discovery 30 years ago(18). We deleted the open reading frame of HAP4 in *S.*



99 *cerevisiae* strain BY4741, and checked the expression trait of the other yeast genes by  
100 sequencing the transcriptome of the strains that grow in the rich medium YPD at 30 °C  
101 (Table S1). We found 195 responsive genes each with a significant expression change  
102 under a stringent statistical cutoff (Table S2). Gene ontology (GO) analysis of the 195  
103 genes revealed one third of them (65/195) clustered more than expected by chance in  
104 dozens of GO terms. These GO terms are related with each other and reflect well the  
105 functional annotations of HAP4 as a regulator of mitochondria activities(19) (Fig. 1A).  
106 The remaining two thirds (130/195) distribute rather randomly across diverse biological  
107 processes, underscoring the strong pleiotropy of HAP4. The two sets of genes are all  
108 functionally characterized with clear GO annotations (Table S2), and have comparable  
109 fitness importance ( $P = 0.1$ , Mann-Whitney U-test; Fig. S1). Notably, the 65 clustered  
110 deletion effects and 130 distributed deletion effects are supported by similar P-values  
111 and fold changes ( $P = 0.20$  and  $0.46$ , respectively, Mann-Whitney U-test; Fig. 1B).

112 Because evolution happens in a population rather than in an individual, it is  
113 important to test the population-level heritability of the deletion effects. We crossed  
114 two *S. cerevisiae* strains to obtain a population of yeast segregants. Specifically, a  
115 wild-type strain BY4742(*MATalpha*), which is identical to BY4741 except at the  
116 mating locus, was crossed with the HAP4 deletion line of DBVPG1373(*MATa*) (Fig.  
117 1C). This way, the comparison between wild-type and null alleles at the HAP4 locus  
118 would match the comparison conducted in the isogenic BY4741 background. We  
119 dissected six tetrads of the hybrid and obtained 12 HAP4 wild-type and 12 HAP4 null  
120 segregants. For each of the 195 deletion effects we computed its heritability ( $h^2_{\text{HAP4}}$ )

121 in the segregant population (Methods). The  $h^2_{\text{HAP4}}$  measures the fraction of variance  
122 of an expression trait that is attributed to the HAP4 locus. We noted that the  
123 heritability analysis resembles a forward genetic assay with a candidate genetic locus.  
124 An  $h^2_{\text{HAP4}}$  close to zero suggests HAP4 is not a QTL (Quantitative Trait Locus) of the  
125 expression trait. We found the 65 clustered effects in general have much higher  $h^2_{\text{HAP4}}$   
126 than the 130 distributed effects ( $P = 7.8 \times 10^{-4}$ , Mann-Whitney U-test; Fig. 1D).  
127 Approximately 26.2% (17/65) of the clustered effects have a statistically significant  
128  $h^2_{\text{HAP4}}$ , while the number is 0.8% (1/130) for the distributed effects ( $P = 2.1 \times 10^{-8}$ ,  
129 Fisher's exact test; Fig. 1E). It is worth pointing out that mutational effects sensitive  
130 to genetic backgrounds have been documented in a wide range of organisms(20-23).

131 Because non-heritable phenomena in biology last only one generation, with little  
132 evolutionary consequences, the deletion effects with low population-level heritability  
133 should be evolutionarily unconserved. We obtained, under the same environment and  
134 the same statistical cutoff as in BY4741, the deletion effects of HAP4 in *Saccharomyces*  
135 *paradoxus* strain N17, a closely related yeast species diverged from *S. cerevisiae* ~10  
136 million years ago(24) (Fig. 1F). Only 5.4% (7/130) of the distributed effects found in  
137 *S. cerevisiae* were also observed in the HAP4 deletion line of *S. paradoxus* N17, while  
138 the number was 27.7% (18/65) for the clustered effects ( $P = 3.1 \times 10^{-5}$ , Chi-square test).  
139 The difference was robust as evidenced by plotting the expression responses of the 195  
140 genes in N17( $\Delta hap4$ ) (Fig. 1G). Notably, although the statistical signals were not  
141 directly comparable between the conservation analysis and heritability analysis, there  
142 were 14 overlaps between the 25 conserved effects defined here and the 18 effects with

143 significant  $h^2_{\text{HAP4}}$ . Hence, the heritability analysis based on a rather arbitrary and  
144 small population appeared to represent well the situation in nature. We also examined  
145 intra-species conservation of the HAP4 deletion effects by looking at two other *S.*  
146 *cerevisiae* strains DBVPG1373 and GIL104, the former of which is 0.35% diverged  
147 from the strain BY4741 and the latter 0.07% diverged at the genomic level(25).  
148 Similarly, the 130 distributed effects were largely unreproducible in strains  
149 DBVPG1373( $\Delta hap4$ ) and GIL104( $\Delta hap4$ ), while the 65 clustered effects were much  
150 more conserved ( $P = 0.5 \times 10^{-4}$  for DBVPG1373( $\Delta hap4$ ) and  $P = 2.6 \times 10^{-5}$  for  
151 GIL104( $\Delta hap4$ ), Chi-square test; Fig. S2). As expected, both types of the deletion  
152 effects are more reproducible in more related yeasts (Fig. 1H). We confirmed the  
153 results cannot be explained by different detectability of expression changes between the  
154 two gene sets by excluding those genes lowly expressed in wild-type BY4741 (Fig. S3).  
155 These data, together with the heritability analysis, suggest the clustered effects of HAP4  
156 tend to be evolutionarily selected; on the contrary, the distributed genetic effects appear  
157 largely non-evolutionary, likely representing *ad hoc* responses to the gene deletion(16).

158 HAP4 functions by forming a tetramer with HAP2, HAP3 and HAP5, which is a  
159 result of evolution(18). We hypothesized clustered effects should support this  
160 biochemistry understanding better than distributed effects, because the latter is non-  
161 evolutionary. To test the hypothesis, we deleted the other three genes that encode the  
162 tetramer, respectively, in *S. cerevisiae* BY4741, and measured the expression profiles  
163 of the deletion lines. We defined clustered effects and distributed effects for each of  
164 the lines using the same method as in the HAP4 deletion line. We obtained 43, 150

165 and 50 clustered effects, and 61, 306 and 111 distributed effects for the deletions of  
166 HAP2, HAP3 and HAP5, respectively (Fig. 2A-C; Table S3). Consistent with the  
167 hypothesis, we found 20 overlapped clustered effects across the four gene deletion lines,  
168 14.5 times higher than that of the distributed effects ( $P < 0.001$ , simulation test, Fig.  
169 2D). Notably, the 20 overlapped clustered effects are not the strongest in  
170 BY4741( $\Delta hap4$ ) (Fig. S4). To avoid the potential bias that expression responses to  
171 the tetramer may have been considered in the GO annotations of the responsive genes,  
172 we excluded all expression-related evidences for GO annotations to define new  
173 clustered and distributed effects. We obtained essentially the same result (Fig. S5).  
174 Because there are publicly available microarray data for HAP2, HAP3, HAP4 and  
175 HAP5 deletion lines(26), we also repeated the analysis using the public expression data  
176 and observed a similar pattern (Fig. S6).

177 In addition to considering the protein complex formed by HAP4, we could also  
178 consider protein-DNA interactions since HAP4 is a transcription factor. Data from a  
179 chromatin immuno-precipitation (CHIP) assay of the promoters bound by HAP4 show  
180 that, among the 195 responsive genes observed in BY4741( $\Delta hap4$ ), 13 are direct targets  
181 of HAP4 (Fig. 2E)(27, 28). Interestingly, there is 24-fold enrichment of direct targets  
182 in the clustered effects relative to the distributed effects ( $P = 8.6 \times 10^{-6}$ , Fisher's exact  
183 test); among the 20 overlapped clustered effects 50% (10/20) are direct targets of HAP4,  
184 while the genomic background is 0.64% (33/5146) ( $P = 4.6 \times 10^{-18}$ , Hypergeometric test)  
185 (Fig. 2F). Hence, the CHIP data well support the distinction of the two effect types.

186 Collectively, these results are consistent with a previous model(16) (Box 1), in

187 which the null phenotype of a gene can be ascribed to either the loss of the gene's native  
188 functions, or the gain of spurious functions that arise from passive adjustments of the  
189 cellular system after the perturbation. The key difference of the two function types is  
190 their evolutionary nature: native functions are historical, selected, and evolutionary,  
191 while spurious functions are ahistorical, *ad hoc*, and non-evolutionary (29-31).  
192 Accordingly, the distributed effects examined here likely represent spurious functions  
193 created by the HAP4 deletion, and the clustered effects could be in a large part ascribed  
194 to the native functions of HAP4. It is intriguing how the two effect types defined by  
195 GO could fit the two function types described in the model. We reasoned that  
196 evolutionarily optimized native functions are likely to regulate specific pathways or  
197 processes; losing them would thus cause coordinating changes of the related genes(9),  
198 which are detected by GO analysis. In contrast, spurious functions may affect the  
199 transcriptome in a rather random way, resulting in distributed changes across diverse  
200 cellular processes, most of which cannot be covered by overrepresented GO terms.  
201 This may explain why GO clustering here could echo evolutionary effectiveness.

202       Regardless of the underlying logic, clustered genetic effects seem to be well  
203 matched with related biochemical understandings. This would help address a long-  
204 standing challenge to molecular biology - the gap between genetic analysis and  
205 biochemistry analysis(14, 32); specifically, genes with intimate biochemical  
206 interactions do not have common genetic effects and genes with common genetic  
207 effects do not show intimate biochemical interactions(33, 34). To test the generality  
208 of the finding that was based on the HAP2/3/4/5 tetramer, we examined other

209 biochemically characterized protein complexes by using publicly available expression  
210 data. To avoid bias we considered a single dataset comprising microarray-based  
211 expression profiles of over one thousand yeast gene deletion lines(26). There are 54  
212 protein complexes annotated by a previous study suitable for our analysis(35). In 24  
213 cases the overlaps of clustered effects are significantly more than what would be  
214 expected from distributed effects at a 99% confidence level, and the enrichments range  
215 from 2.7-fold to over 100-fold with a median 5.3-fold (Fig. 3A and Table S4). The  
216 overlapped clustered effects of each protein complex represent specific functions (Fig.  
217 3B-C and Fig. S7). For example, the ten overlapped clustered effects of the elongator  
218 holoenzyme complex are tens to hundreds times overrepresented in a few transcription-  
219 related GO terms as well as proteasome-related GO terms (Fig. 3B), the former of  
220 which echo well the annotated functions of the complex while the latter appear to  
221 suggest new understandings(36). As another example, the genes encoding the protein  
222 kinase CK2 complex have 21 overlapped clustered effects that appear to affect  
223 specifically the metabolism of various amino acids (Fig. 3C), a functional insight not  
224 been well recognized(37).

225 We also checked genes on the same KEGG pathways. There are 41 pathways that  
226 are related to metabolism, genetic information processing, cellular processes, and so on,  
227 suitable for our analysis (Table S5). The rate of overlaps of clustered effects is  
228 significant higher than that of distributed effects in nine cases, and the enrichments  
229 range from 5.6-fold to over 100-fold with a median 46.9-fold (Fig. 3D and Table S5).  
230 Consistently, the overlapped clustered effects of each pathway represent distinct

231 functions (Fig. 3E-F and Fig. S7). For the many cases in which clustered effects show  
232 no more overlaps than distributed effects, the involved genes may execute additional  
233 functions irrelevant to the focal complex or pathway. Notably, in none of the cases  
234 distributed effects represent related biochemical understandings better than clustered  
235 effects, highlighting the cryptic nature of them. Taken together, focusing on clustered  
236 effects appears to be a readily operational approach to narrowing the gap between  
237 genetic analysis and biochemical data.

238 The above analyses considered gene expression traits. We next examined the  
239 yeast cell morphological traits that are based on the microscopic images of cells stained  
240 by fluorescent dyes(38). With the help of a computer software as many as 405  
241 quantitative traits can be obtained from cell wall and nuclear stained cell images(39).  
242 These traits are typically about area, distance, and angle calculated based on dozens of  
243 coordinate points, lines and angles that describe the shape of mother cell and bud, and  
244 the shape and localization of the nuclei in mother cell and bud (Fig. 4A). This large  
245 set of yeast traits had served as a valuable resource for studying genotype-phenotype  
246 relationships(9, 40, 41). Deletion of HAP4 in *S. cerevisiae* significantly altered 78  
247 morphological traits, among which 24 are also significantly affected in *S. paradoxus* by  
248 HAP4 deletion (Table S6). To test if the evolutionarily conserved effects of HAP4 are  
249 shared with HAP2, HAP3 and HAP5 more than the non-conserved effects, we also  
250 measured the morphological traits affected by each of the other three genes, respectively,  
251 in *S. cerevisiae*. We found that 58.3% (14/24) of the conserved effects are shared with  
252 all the other three genes, which is significantly higher than the number ( $18/54 = 33.3\%$ )

253 for the non-conserved effects of HAP4 ( $P = 0.035$ , Fisher's exact test; Fig. 4B). The  
254 estimations are not explained by correlated traits (Fig. S8), and the difference remains  
255 largely unchanged when only traits with small measuring noise are considered (Fig. S9).  
256 Hence, the cell morphology data also support the role of evolution in separating genetic  
257 effects.

258

## 259 **Discussion**

260 Thanks to the mature framework of measuring the selective constraints on DNA  
261 sequence(42), the evolution-free functionality of DNA elements defined in ENCODE  
262 was challenged immediately after its emergence(11, 12). Notably, the gene-trait  
263 interactions defined in reverse genetic analyses are also based on an evolution-free  
264 framework. However, this century-old problem has been largely ignored, despite  
265 exceptions(43, 44), primarily due to the lack of a readily available measure of the  
266 underlying evolutionary constraint. In this study we performed, for the first time to  
267 the best of our knowledge, a rigorous test of the evolutionary nature of a set of gene  
268 deletion effects by examining their within-population heritability and intra-/inter-  
269 species conservation. We found only some of them subject to effective selection, with  
270 the rest likely being *ad hoc* and non-evolutionary. That being said, we cautioned some  
271 effects might be under very weak selection that was beyond the detection power of our  
272 analyses. This concern would be alleviated by a reasonable assumption that effects  
273 under very weak selection are not distinct from those under no selection in the  
274 functional properties examined in the study. Similar to the *ad hoc* “functional” DNA



275 elements defined in ENCODE(10), the *ad hoc* genetic effects are presumably explained  
276 by mutation equilibrium or spurious functions arising from the gene deletion(16).  
277 Importantly, since such *ad hoc* effects have not yet been shaped by evolution, they are  
278 unlikely to be compatible with the roles the focal gene has long played in evolution(9).  
279 This may explain in great part the origin of gene pleiotropy.

280       Conceptually speaking, our evolutionary view on genetic effects is an extension of  
281 the evolutionary view on the biochemical activities of DNA elements(11, 12). Hence,  
282 pros and cons that have widely discussed in the debates on the ENCODE project apply  
283 similarly to this study. For example, because detecting selection involves multiple  
284 lineages, one cannot rule out the possible that an entity under no detectable selection is  
285 actually subject to lineage-specific selection(11). However, since the lineages  
286 examined are often closely related, lineage-specific entities selected in a short time  
287 window should be rare compared to those acquired during the long time period  
288 predating the split of the lineages. Operationally speaking, the evolutionary view on  
289 the functionality of DNA elements relies on DNA sequence comparison, which is  
290 straightforward and now mature. However, an evolutionary separation of genetic  
291 effects requires rather complex experimental designs; also, there is no available  
292 framework for modeling the turnover rate of gene-trait interactions under no selection.  
293 Hence, we could, as in this study, only perform enrichment analysis for a group of  
294 genetic effects. Nevertheless, the current limitation in operability does not  
295 challenge the validity of the concept. A surprising finding of this study is GO  
296 clustering can serve as a useful and readily operational proxy for selection when

297 expression traits are examined. The underlying rationale, namely, functional  
298 coordination built by selection, may help us design more efficient strategies for  
299 delineating the evolutionary nature of genetic effects in the future.

300 In summary, by examining the evolutionary nature of a set of gene deletion effects  
301 we revealed widespread decoupling of gene deletion effects from gene functions. This  
302 calls for an expanded framework for reverse genetic analysis (Fig. 4C). Specifically,  
303 the conventional framework relies solely on statistical tests to separate the mutant  
304 versus wild-type differences into significant and insignificant effects. In the expanded  
305 framework significant effects are further separated into evolutionarily selected and  
306 evolutionarily *ad hoc* ones. Only the former would support the biochemical  
307 understandings with the latter being pleiotropic and decoupled from the gene functions.

308

## 309 **Materials and Methods**

### 310 **Yeast gene deletions**

311 Three *S. cerevisiae* (SC) strains BY4741 (*MATa, his3, leu2, met15, ura3*), GIL104  
312 (*MATa, URA3, leu2, trp1, CAN1, ade2, his3, bar1Δ::ADE2*; derived from the W303)  
313 and DBVPG1373 (*MATa, ura3*), and one *S. paradoxus* (SP) strain N17 (*MATa, ura3*)  
314 were included in the study. Unless otherwise stated, the *S. cerevisiae* strains were  
315 cultured in the rich medium YPD (1% Yeast extract, 1% Peptone, 2% Dextrose) at 30°C,  
316 and *S. paradoxus* N17 was cultured in YPD at 25°C. The wild type URA3 in GIL104  
317 was first replaced by a LEU2 cassette. HAP4 was replaced by a URA3 cassette in  
318 each of the four strains. HAP2, HAP3, and HAP5 were also replaced, respectively,  
319 by a URA3 cassette in BY4741. Notably, for all gene replacements the whole open  
320 reading frame from the starting codon to the stop codon of a focal gene was replaced.  
321 As described in our previous study(22), the standard LiAc transformation method(45)  
322 was used to transform DNA into the yeast cells and gene replacements were achieved  
323 by homologous recombination. The transformation protocol was slightly modified for  
324 *S. paradoxus*(46); specifically, heat shock was performed for seven minutes at 37°C.  
325 Synthetic medium deprived of uracil or leucine was used to select the clones with  
326 successful replacement for the target gene. All gene replacements were verified using  
327 polymerase chain reaction (PCR). For each gene deletion line, 3-5 independent clones  
328 were obtained for further examination, which effectively controlled the potential effects

329 of secondary mutations introduced during the gene replacement.

330 Because haploid yeast cells tend to flocculate, which is not suitable for cell  
331 morphology characterization, diploid yeasts are required in the analysis of  
332 morphological traits. We first obtained haploid gene deletion strains (SC-BY4741 or  
333 SP-N17 background; *MATa*), which were then crossed with the corresponding  
334 *MATalpha* wild-type strain, respectively. The diploid heterozygous gene deletion  
335 strains were sporulated by following the method of a previous study(47). Specifically,  
336 the cells were incubated in YEP (1% yeast extract,1% Bacto peptone,0.05% NaCl)  
337 containing 2% potassium acetate) for five hours at 30 °C to start the sporulation  
338 process. The culture was centrifuged (2,000g, for 2 min), the cell pellet was washed  
339 three times by sterile water, and re-suspended in sporulation media (10g/l potassium  
340 acetate and 50mg/l zinc acetate) for five days at 25°C with shaking. The products  
341 were incubated with 200U/ml lyticase (Sigma #L4025) for 30 min at 30°C followed by  
342 15 min at 50°C. The products were washed by sterile water and then plated on  
343 synthetic medium deprived of uracil for two days at 30°C for SC strains, or 25°C for  
344 SP strains. The genotypes of the colonies were determined by PCR. For each gene  
345 the haploid deletion strains of both mating types were obtained. A pair of *MATa* and  
346 *MATalpha* strains with the same gene deletion were crossed to obtain a diploid  
347 homozygous gene deletion strain. For each gene deletion line three independent  
348 clones were obtained and examined.

349

#### 350 **Obtain a population of segregants**

351 A wild-type strain BY4742 (*MATalpha*), which is identical to BY4741 except at the  
352 mating locus, was crossed with a HAP4 deletion stain of DBVPG1373 (*MATa*). Two  
353 biological replications were carried out. The diploid heterozygous deletion strains  
354 were sporulated for 3-5 days in sporulation medium on a shaking table at 25°C.  
355 Tetrads were obtained and incubated with 200U/ml lyticase for 3-5 min at 30°C, and  
356 then streaked onto a YPD plate for tetrad dissection using the MSM400 dissection  
357 microscope (Singer Instrument Company Ltd). Spores were grown on YPD plates at  
358 30°C for two days, and the genotypes of the colonies were determined by PCR. We  
359 selected only those tetrads that produce four segregants with genotypes *MATa*+HAP4,  
360 *MATa*+ $\Delta$ *hap4*, *MATalpha*+HAP4, and *MATalpha*+ $\Delta$ *hap4*, respectively. A total of 24  
361 segregants from six such tetrads were obtained for the heritability analysis.

362

#### 363 **RNA sequencing and data analysis**

364 For each strain a single colony on agar plate was picked and cultured in YPD liquid  
365 overnight at 30 °C with shaking. Approximately 200  $\mu$ l saturated culture was added  
366 into 10ml fresh YPD, which resulted in an optical density OD600~0.1 (UNICO  
367 UV/VIS Spectrophotometer), and cells of 3ml culture at OD600=0.5-0.65 were  
368 harvested. Total RNA was extracted by QIAGEN RNeasy Plus mini kit (Cat  
369 No.74136). The mRNA sequencing was performed using the paired-end module on a  
370 HiSeq platform at Genewiz by following the standard procedure. To ensure the high  
371 quality of expression analysis, we sequenced the mRNA of 3-6 independent clones for  
372 each wild-type or gene deletion line.

373 RNA-seq reads were mapped to reference yeast genomes using STAR (Version  
374 2.6.0c)(48). For BY4741 and GIL104, we used the genome of *S. cerevisiae* strain  
375 S288C as the reference (version R64-2-1\_20150113; <http://www.yeastgenome.org>).  
376 The reference genomes of SC-DBVPG1373 and SP-N17 were downloaded from SGRP  
377 (<https://www.sanger.ac.uk/research/projects/genomeinformatics/sgrp.html>). For a  
378 typical clone there were about 6.5 million paired-end reads mapped to the coding  
379 sequences. Gene expression levels were determined by Featurecounts (version  
380 1.6.2)(49) with default settings and RPKM (reads per kilobase per million) of each gene  
381 were calculated by R package edgeR. The wild-type versus mutant differential  
382 expression analysis was performed by DESeq2(50) with default parameters, and genes  
383 with an adjusted P-value smaller than 0.05 and a fold change (FC) greater than 1.5 were  
384 defined as significantly changed genes. In the conservation, heritability or  
385 overlapping analysis, an effect is called conserved, heritable or overlapped only when  
386 it shows the same direction in the various conditions examined. Genes of the uracil  
387 biosynthesis pathway (YBL039C, YEL021W, YJL130C, YJR103W, YKL024C,  
388 YKL216W, YLR420W, YML106W, YMR271C) were excluded from further analysis.  
389 The expression level measured by RPKM of HAP2, HAP3, HAP4 and HAP5 in wild-  
390 type BY4741 is 84.4, 64, 194 and 90.5, respectively, and all becomes zero in the  
391 corresponding deletion lines. The fitness of yeast gene deletion lines was produced  
392 by a previous study(51). Table S1 contains details of the RNA-seq expression  
393 information of all yeast lines examined in this study.

394

### 395 **GO analysis**

396 The GO analyses of the responsive genes derived from our RNA-seq data were  
397 conducted in the SGD website using GO Term Finder (Version 0.86;  
398 <https://www.yeastgenome.org/goTermFinder>), by excluding computational analysis  
399 evidences and other less reliable evidences: IBA, IC, IEA, IKR, IRD, ISA, ISM, ISO,  
400 ISS, NAS, ND, TAS. In a strict analysis which required the exclusion of all  
401 expression-related evidences, only three GO evidence codes IDA, HDA and IPI that  
402 represent direct experimental assays were considered. For the GO analyses of public  
403 microarray data the R package clusterProfiler(52) was used with default settings. The  
404 cutoffs used to define an enriched GO term include an adjusted P-value smaller than  
405 0.01 and a fold enrichment greater than 2. To improve specificity only GO terms  
406 containing less than 200 genes were considered. The fold enrichment was calculated  
407 as (number of changed genes in the GO term / number of all changed genes) / (number  
408 of genes in the GO term / number of genes in all GO terms of the class). The GO  
409 semantic similarity scores were calculated by R package GOSemSim(53).

410

### 411 **Heritability analysis**

412 Following a previous study(54), for each of the 195 genes the expression is expressed  
413 as  $y = \mu 1_N + u + e$ , where  $y$  is a vector of the expression level ( $\log_2$ RPKM) in the 24  
414 segregants,  $\mu$  is the mean expression level in the 24 segregants,  $1_N$  is a vector of N ones,  
415  $u$  is a vector of random additive genetic effects from the HAP4 locus, and  $e$  is a vector  
416 of residuals. The variance structure of an expression trait is written as  $V = A\sigma_u^2 +$

417  $I\sigma_e^2$ , where  $A$  is relatedness matrix based exclusively on the HAP4 locus (1 for wild-  
418 type allele and 0 for null allele),  $I$  is identity matrix,  $\sigma_u^2$  is additive genetic variance  
419 explained by HAP4 locus, and  $\sigma_e^2$  is error variance. Then, the value of  $h^2_{\text{HAP4}}$  is  
420 equal to  $\sigma_u^2/(\sigma_u^2 + \sigma_e^2)$ . R package rrBLUP was used to estimate the variance  
421 components.

422 To test the statistical significant of an  $h^2_{\text{HAP4}}$ , 24 segregants were divided into two  
423 groups: 12 with the wild-type allele of HAP4 and 12 with the null allele of HAP4. We  
424 compared the expression levels of the focal gene between the two segregant groups  
425 using DESeq2. The obtained 195 raw P-values were adjusted for multiple testing  
426 using the Benjamini-Hochberg controlling procedure. An adjusted P-value smaller  
427 than 0.05 was considered significant.

428

### 429 **Analyze protein complexes and metabolic pathways**

430 The public microarray data of ~1,400 yeast gene deletion lines were obtained from a  
431 previous study(26), and P-values and fold changes (FC) provided in the data were  
432 directly used. Specifically,  $P < 0.05$  and absolute  $FC > 1.2$  were used to define genes  
433 with significant expression changes; if the number of significantly changed genes was  
434 over 1,500, a more stringent cutoff  $P < 0.01$  was used. To avoid the effects of genes  
435 with ubiquitous expression responses we excluded from further analyses the top 10%  
436 genes that each show significant changes in at least 12% of the gene deletion lines.  
437 GO analyses were performed by R package clusterProfiler to define clustered and  
438 distributed effects for each deletion line, with the results summarized in Table S7. To  
439 examine the overlapped clustered effects between genes of the same protein complex  
440 or pathway, we only considered the deletion lines with at least 20 clustered effects,  
441 resulting in a set of 422 deletion lines suitable for further analyses.

442 Information of 518 protein complexes was obtained from a previous study (35).  
443 The KEGG pathways of the yeast *S. cerevisiae* were downloaded from KEGG website  
444 ([https://www.genome.jp/kegg-bin/get\\_htext?sce00001](https://www.genome.jp/kegg-bin/get_htext?sce00001)). There are 54 complexes and  
445 41 pathways each with at least two member genes found in the above defined mutant  
446 set.

447 For each protein complex or pathway, the overlaps of clustered effects and the  
448 overlaps of distributed effects were compared in number. The numbers of clustered  
449 effects and distributed effects of the involved genes were normalized to make the  
450 overlaps between the two effect types comparable. To estimate the confidence  
451 interval of a comparison we used random samplings. If clustered effects are less than  
452 distributed effects in all genes, which is true in most of the cases examined, we sampled  
453 (without replacements) a random subset of distributed effects to ensure the two effect  
454 types of a gene equal in number. If clustered effects are more than distributed effects  
455 in all genes, we sampled (without replacements) a random subset of distributed effects  
456 to ensure the two effect types of a gene equal in number. If the above consistent  
457 patterns do not exist, we sampled consistently from one side (either clustered effects or  
458 distributed effects) but with replacements for the gene with an insufficient number of  
459 effects on this side. For each complex or pathway 1,000 such random samplings were  
460 carried out to derive the 99% confidence interval, and an observed difference is called



461 significant if it is not within the interval. Table S4 and Table S5 have details about the  
462 protein complexes and KEGG pathways examined, respectively.

463

#### 464 **Analyze cell morphological traits**

465 Diploid yeast cells were examined by following the protocol of previous studies with  
466 slight modifications(38, 39). In brief, a single yeast colony was picked and cultured  
467 in YPD liquid overnight with shaking to the saturation phase. Then, 1.5  $\mu$ l culture  
468 was transferred to 100 $\mu$ l fresh YPD in a 96-well plate and grew for 3-4 hours at 30°C  
469 for SC strains or 25°C for SP strains. Cells were fixed with 3.7% formaldehyde  
470 solution. Cell wall was stained by FITC-ConA (fluorescein isothiocyanate-  
471 conjugated, concanavalin A, Sigma-Aldrich C7642). Cell nucleus was stained by  
472 hochest-mix (Thermo Fisher, Hoechst 33342 Solution) instead of DAPI to enhance the  
473 specificity. We did not stain actin because the dye Rhodamine phalloidin was not  
474 stable enough to support the following high-throughput automated image capturing  
475 which takes about 10 hours for scanning 96 wells of a plate. The stained cells were  
476 plated into a microplate (Greiner 781091) with  $\sim 5.0 \times 10^4$  cells per well and images were  
477 captured by IN Cell Analyzer 2200 (GE Healthcare) using the 60 $\times$  objective lens.

478 Five SC lines (all diploid with BY4741 background: wild-type, *Δhap2*, *Δhap3*,  
479 *Δhap4* and *Δhap5*) and two SP lines (all diploid with N17 background: wild-type and  
480 *Δhap4*) were examined. Because the trait measuring is quite sensitive to batch effect,  
481 for each line we conducted 18-24 replicates of staining and image capturing. The  
482 images were analyzed by CalMorph(38, 39) with default settings, and only 405 rather  
483 than 501 traits were extracted in this study because actin is not stained. At least 1,000  
484 cells were captured and analyzed (with at least 100 informative cells for each cell-cycle  
485 stage) for a high-quality replicate. In the end, there were 13~23 high-quality replicates  
486 for each of the lines included in further analysis. Trait values were compared between  
487 replicates of a gene deletion line and replicates of the corresponding wild-type line  
488 using T-test, and the resulting 405 P-values were adjusted for multiple testing using the  
489 Benjamini-Hochberg controlling procedure. Because of the many replicates included  
490 in the comparison, many traits showed a statistically significant but biologically  
491 negligible difference between wild-type and mutant lines. Hence, a trait is called  
492 affected by a gene only when the adjusted  $P < 0.05$  and the difference between wild-  
493 type and mutant is large than 5%. Table S8 has complete information regarding the  
494 morphological trait analysis.

495

#### 496 **Acknowledgments**

497 We are grateful to financial support from NSFC (grant #31630042 and #91731302 to  
498 X. H.), technical support from Z. Zhou and X. Chen, and helpful discussions with C.  
499 Wu, J. Yang, J. Zhang, W. Qian, and Y. Zhang.

500

#### 501 **References**

- 502 1. H. J. Muller, Further studies on the nature and causes of gene mutations. *Proceedings of the*  
503 *6th International Congress of Genetics*, 213-255 (1932).
- 504 2. Z. Wang, B. Y. Liao, J. Zhang, Genomic patterns of pleiotropy and the evolution of complexity.

- 505 *Proc Natl Acad Sci U S A* **107**, 18034-18039 (2010).
- 506 3. E. J. E. Caspari, PLEIOTROPIC GENE ACTION. **6**, 1-18 (1952).
- 507 4. B. Sonnichsen *et al.*, Full-genome RNAi profiling of early embryogenesis in *Caenorhabditis*  
508 *elegans*. *Nature* **434**, 462-469 (2005).
- 509 5. A. B. Paaby, M. V. Rockman, The many faces of pleiotropy. *Trends Genet* **29**, 66-73 (2013).
- 510 6. F. W. Stearns, One hundred years of pleiotropy: a retrospective. *Genetics* **186**, 767-773 (2010).
- 511 7. X. L. He, J. Z. Zhang, Toward a molecular understanding of pleiotropy. *Genetics* **173**, 1885-1891  
512 (2006).
- 513 8. F. J. Ayala, "Nothing in biology makes sense except in the light of evolution": Theodosius  
514 Dobzhansky: 1900-1975. *J Hered* **68**, 3-10 (1977).
- 515 9. H. Chen, C. I. Wu, X. He, The Genotype-Phenotype Relationships in the Light of Natural  
516 Selection. *Mol Biol Evol* **35**, 525-542 (2018).
- 517 10. E. P. Consortium, An integrated encyclopedia of DNA elements in the human genome. *Nature*  
518 **489**, 57-74 (2012).
- 519 11. D. Graur *et al.*, On the Immortality of Television Sets: "Function" in the Human Genome  
520 According to the Evolution-Free Gospel of ENCODE. *Genome Biol Evol* **5**, 578-590 (2013).
- 521 12. W. F. Doolittle, Is junk DNA bunk? A critique of ENCODE. *Proc Natl Acad Sci U S A* **110**, 5294-  
522 5300 (2013).
- 523 13. M. Kellis *et al.*, Defining functional DNA elements in the human genome. *Proc Natl Acad Sci U*  
524 *S A* **111**, 6131-6138 (2014).
- 525 14. A. J. F. Griffiths, *An Introduction to genetic analysis*. (W.H. Freeman, New York, ed. 5th, 1993),  
526 pp. xi, 840 p.
- 527 15. D. Alzoubi, A. A. Desouki, M. J. Lercher, Alleles of a gene differ in pleiotropy, often mediated  
528 through currency metabolite production, in *E. coli* and yeast metabolic simulations. *Sci Rep* **8**,  
529 17252 (2018).
- 530 16. X. He, The Biology Complicated by Genetic Analysis. *Mol Biol Evol* **33**, 2177-2181 (2016).
- 531 17. S. L. Forsburg, L. Guarente, Identification and characterization of HAP4: a third component of  
532 the CCAAT-bound HAP2/HAP3 heteromer. *Genes Dev* **3**, 1166-1178 (1989).
- 533 18. M. Bolotin-Fukuhara, Thirty years of the HAP2/3/4/5 complex. *Biochim Biophys Acta Gene*  
534 *Regul Mech* **1860**, 543-559 (2017).
- 535 19. S. Buschlen *et al.*, The *S. Cerevisiae* HAP complex, a key regulator of mitochondrial function,  
536 coordinates nuclear and mitochondrial gene expression. *Comparative and functional genomics*  
537 **4**, 37-46 (2003).
- 538 20. D. W. Threadgill *et al.*, Targeted disruption of mouse EGF receptor: effect of genetic background  
539 on mutant phenotype. *Science* **269**, 230-234 (1995).
- 540 21. V. Vu *et al.*, Natural Variation in Gene Expression Modulates the Severity of Mutant Phenotypes.  
541 *Cell* **162**, 391-402 (2015).
- 542 22. P. Chen, D. Wang, H. Chen, Z. Zhou, X. He, The nonessentiality of essential genes in yeast  
543 provides therapeutic insights into a human disease. *Genome Res* **26**, 1355-1362 (2016).
- 544 23. A. Evangelou *et al.*, Unpredictable Effects of the Genetic Background of Transgenic Lines in  
545 Physiological Quantitative Traits. *G3 (Bethesda)* **9**, 3877-3890 (2019).
- 546 24. M. Kellis, N. Patterson, M. Endrizzi, B. Birren, E. S. Lander, Sequencing and comparison of yeast  
547 species to identify genes and regulatory elements. *Nature* **423**, 241-254 (2003).
- 548 25. G. Liti *et al.*, Population genomics of domestic and wild yeasts. *Nature* **458**, 337-341 (2009).

- 549 26. P. Kemmeren *et al.*, Large-scale genetic perturbations reveal regulatory networks and an  
550 abundance of gene-specific repressors. *Cell* **157**, 740-752 (2014).
- 551 27. C. T. Harbison *et al.*, Transcriptional regulatory code of a eukaryotic genome. *Nature* **431**, 99-  
552 104 (2004).
- 553 28. K. D. MacIsaac *et al.*, An improved map of conserved regulatory sites for *Saccharomyces*  
554 *cerevisiae*. *BMC Bioinformatics* **7**, 113 (2006).
- 555 29. K. Neander, Functions as Selected Effects: The Conceptual Analyst's Defense. *Philosophy of*  
556 *Science* **58**, 168-184 (1991).
- 557 30. R. G. Millikan, In Defense of Proper Functions. *Philosophy of Science* **56**, 288-302 (1989).
- 558 31. R. Amundson, G. V. Lauder, Function without purpose. *Biology and Philosophy* **9**, 443-469  
559 (1994).
- 560 32. S. L. Wong, L. V. Zhang, F. P. Roth, Discovering functional relationships: biochemistry versus  
561 genetics. *Trends Genet* **21**, 424-427 (2005).
- 562 33. X. He, W. Qian, Z. Wang, Y. Li, J. Zhang, Prevalent positive epistasis in *Escherichia coli* and  
563 *Saccharomyces cerevisiae* metabolic networks. *Nat Genet* **42**, 272-276 (2010).
- 564 34. M. Costanzo *et al.*, A global genetic interaction network maps a wiring diagram of cellular  
565 function. *Science* **353**, (2016).
- 566 35. J. J. Benschop *et al.*, A consensus of core protein complex compositions for *Saccharomyces*  
567 *cerevisiae*. *Mol Cell* **38**, 916-928 (2010).
- 568 36. J. Q. Svejstrup, Elongator complex: how many roles does it play? *Current Opinion in Cell Biology*  
569 **19**, 331-336 (2007).
- 570 37. D. W. Litchfield, Protein kinase CK2: structure, regulation and role in cellular decisions of life  
571 and death. *The Biochemical journal* **369**, 1-15 (2003).
- 572 38. Y. Ohya *et al.*, High-dimensional and large-scale phenotyping of yeast mutants. *Proc Natl Acad*  
573 *Sci U S A* **102**, 19015-19020 (2005).
- 574 39. H. Okada, S. Ohnuki, Y. Ohya, Quantification of cell, actin, and nuclear DNA morphology with  
575 high-throughput microscopy and CalMorph. *Cold Spring Harb Protoc* **2015**, 408-412 (2015).
- 576 40. W. C. Ho, J. Zhang, The genotype-phenotype map of yeast complex traits: basic parameters and  
577 the role of natural selection. *Molecular biology and evolution* **31**, 1568-1580 (2014).
- 578 41. S. Nogami, Y. Ohya, G. Yvert, Genetic complexity and quantitative trait loci mapping of yeast  
579 morphological traits. *Plos Genet* **3**, e31 (2007).
- 580 42. D. Graur, W.-H. Li, *Fundamentals of molecular evolution*. (Sinauer Associates, Sunderland,  
581 Mass., ed. 2nd, 2000), pp. xiv, 481 p.
- 582 43. C. H. Chandler, S. Chari, I. Dworkin, Does your gene need a background check? How genetic  
583 background impacts the analysis of mutations, genes, and evolution. *Trends Genet* **29**, 358-366  
584 (2013).
- 585 44. C. H. Chandler *et al.*, How well do you know your mutation? Complex effects of genetic  
586 background on expressivity, complementation, and ordering of allelic effects. *PLoS Genet* **13**,  
587 e1007075 (2017).
- 588 45. R. D. Gietz, R. H. J. N. p. Schiestl, High-efficiency yeast transformation using the LiAc/SS carrier  
589 DNA/PEG method. *Nat. Protoc.* **2**, 31-34 (2007).
- 590 46. D. R. Scannell *et al.*, The Awesome Power of Yeast Evolutionary Genetics: New Genome  
591 Sequences and Strain Resources for the *Saccharomyces sensu stricto* Genus. *G3-Genes Genom*  
592 *Genet* **1**, 11-25 (2011).



- 593 47. A. H. Enyenihi, W. S. Saunders, Large-scale functional genomic analysis of sporulation and  
594 meiosis in *Saccharomyces cerevisiae*. *Genetics* **163**, 47-54 (2003).
- 595 48. A. Dobin *et al.*, STAR: ultrafast universal RNA-seq aligner. *Bioinformatics* **29**, 15-21 (2013).
- 596 49. Y. Liao, G. K. Smyth, W. Shi, featureCounts: an efficient general purpose program for assigning  
597 sequence reads to genomic features. *Bioinformatics* **30**, 923-930 (2014).
- 598 50. M. I. Love, W. Huber, S. Anders, Moderated estimation of fold change and dispersion for RNA-  
599 seq data with DESeq2. *Genome Biol* **15**, 550 (2014).
- 600 51. W. Qian, D. Ma, C. Xiao, Z. Wang, J. Zhang, The Genomic Landscape and Evolutionary Resolution  
601 of Antagonistic Pleiotropy in Yeast. *Cell reports* **2**, 1399-1410 (2012).
- 602 52. G. C. Yu, L. G. Wang, Y. Y. Han, Q. Y. He, clusterProfiler: an R Package for Comparing Biological  
603 Themes Among Gene Clusters. *Omics-a Journal of Integrative Biology* **16**, 284-287 (2012).
- 604 53. G. C. Yu *et al.*, GOsemSim: an R package for measuring semantic similarity among GO terms  
605 and gene products. *Bioinformatics* **26**, 976-978 (2010).
- 606 54. S. H. Lee, N. R. Wray, M. E. Goddard, P. M. Visscher, Estimating missing heritability for disease  
607 from genome-wide association studies. *Am J Hum Genet* **88**, 294-305 (2011).

608  
609  
610  
611  
612  
613  
614  
615  
616  
617  
618  
619  
620  
621  
622  
623  
624  
625  
626  
627  
628  
629  
630  
631  
632  
633  
634  
635  
636

637 **Figure legends**

638 **Fig. 1. Tests of evolutionary effectiveness of HAP4 deletion effects.**

639 **(A):** The 195 responsive genes are enriched in dozens of GO terms that are related and  
640 also reflect well the functional annotations of HAP4. The heatmap shows the pairwise  
641 similarity of the enriched GO terms, with three subclasses each corresponding to certain  
642 biological processes that are summarized at the right.

643 **(B):** The  $P$ -value (adjusted for multiple testing) and fold change (FC) of the 65 clustered  
644 effects and 130 distributed effects. Each dot represents a responsive gene (i.e., an  
645 effect).

646 **(C):** Obtain a population of segregants with different genetic backgrounds to test the  
647 heritability of HAP4 deletion effects.

648 **(D):** The 65 clustered effects have greater  $h^2_{\text{HAP4}}$  than the 130 distributed effects ( $P =$   
649  $7.8 \times 10^{-4}$ , Mann-Whitney U-test). Each dot represents an effect, and  $P$ -value measures  
650 the statistical significance of  $h^2_{\text{HAP4}}$ , with the vertical dashed line showing adjusted  $P =$   
651 0.05.

652 **(E):** The proportions of deletion effects that are significantly heritable with adjusted  $P$   
653  $< 0.05$ . Error bars represent SE.

654 **(F):** A dendrogram showing the phylogeny the four yeast strains examined in this study.

655 **(G):** Conservation analysis of the HAP4 deletion effects. The 195 responsive genes  
656 defined in BY4741( $\Delta hap4$ ) are examined with respect to their expression responses in  
657 *S. paradoxus* N17 ( $\Delta hap4$ ). The horizontal dashed line shows adjusted  $P = 0.05$  and  
658 vertical dashed lines show  $\log_2 \text{FC} = \pm 0.58$ . (cyan: clustered effects; red: distributed  
659 effects; cycle: down-regulated in BY4741( $\Delta hap4$ ); triangle: up-regulated in  
660 BY4741( $\Delta hap4$ ))

661 **(H):** The rate of conservation in the three related yeasts for the 65 clustered effects and  
662 130 distributed effects defined in BY4741( $\Delta hap4$ ), respectively. Error bars represent  
663 SE.

664

665 **Fig. 2. Clustered effects of the four genes encoding the HAP2/3/4/5 tetramer**  
666 **overlap a lot more than their distributed effects do.**

667 **(A, B, C):** The  $P$ -value (adjusted for multiple testing) and fold change (FC) of the  
668 clustered effects and distributed effects defined in the three BY4741 strains  $\Delta hap2$ ,  
669  $\Delta hap3$ , and  $\Delta hap5$ , respectively. Each dot represents a responsive gene (i.e., an effect),  
670 and the total number of responsive genes is shown at the bottom next to the effect type.

671 **(D):** There are 20 overlapped clustered effects for the four genes encoding the  
672 HAP2/3/4/5 tetramer, which is significantly higher than expectation. The expectation  
673 is estimated by random sampling of the distributed effects of the four genes to calculate  
674 overlaps, and 1,000 such simulations were conducted.

675 **(E):** Among the 195 responsive genes found in BY4741( $\Delta hap4$ ) 13 are direct target of  
676 HAP4 according to a chromatin immune-precipitation assay.

677 **(F):** The proportion of direct target of HAP4 in different gene sets. Error bars  
678 represent SE.

679

680 **Fig. 3. Clustered effects support related biochemistry understandings much**

681 **better than distributed effects in a variety of protein complexes and KEGG**  
682 **pathways.**

683 **(A):** The clustered effects of genes encoding a protein complex in general overlap more  
684 than their distributed effects. Each circle represents a complex, and the filled ones are  
685 significant at a 99% confidence level estimated by random sampling. A total of 54  
686 protein complexes are included here, with 24 cases showing at least twice more  
687 overlapped clustered effects than overlapped distributed effects (below the line  $y =$   
688  $0.5x$ ). The numbers of effects have been normalized such that in each case the  
689 overlaps of clustered effects and the overlaps of distributed effects can be directly  
690 compared.

691 **(B):** The representative GO terms of the overlapped clustered effects of the elongator  
692 holoenzyme complex. Only four genes encoding the complex, which are highlighted  
693 in orange, have suitable expression data for the analysis. There are 10 overlapped  
694 clustered effects of the four genes, which are over 300 times more than expected. The  
695 expectation is estimated by random sampling of the distributed effects of the focal genes  
696 to calculate overlaps. The orange circle each represents an overlapped clustered effect,  
697 and the blue circles represent the enriched GO terms of the overlapped clustered effects  
698 with the number inside showing the fold enrichment in the given term.

699 **(C):** The representative GO terms of the overlapped clustered effects of the protein  
700 kinase CK2 complex. There are 21 overlapped clustered effects, 83.3 times more than  
701 expected.

702 **(D):** The clustered effects of genes in the same KEGG pathway also tend to overlap  
703 more than their distributed effects. Each circle represents a pathway, and the filled  
704 ones are significant at a 99% confidence level. A total of 41 pathways are included,  
705 with nine showing at least five times more overlapped clustered effects than overlapped  
706 distributed effects (below the line  $y = 0.2x$ ). The number of effects have been  
707 normalized such that in each case the overlaps of clustered effects and the overlaps of  
708 distributed effects can be directly compared.

709 **(E):** The representative GO terms of the overlapped clustered effects of the four genes  
710 in the metabolic pathway sce00260. There are six overlapped clustered effects, over  
711 100 times more than expected.

712 **(F):** The representative GO terms of the overlapped clustered effects of the four genes  
713 in the genetic information processing pathway sce03010. There are 10 overlapped  
714 clustered effects, 21.4 times more than expected.

715

716 **Fig. 4. Examination of cell morphological traits also supports the role of**  
717 **evolution in separating genetic effects.**

718 **(A):** The yeast cell morphology outlined by coordinate points, lines and angles (only  
719 some are shown) based on which a total of 405 quantitative traits can be derived by a  
720 computer software.

721 **(B):** The traits affected by HAP4 in both *S. cerevisiae* and *S. paradoxus* (i.e., conserved  
722 effects) are more likely to overlap with those affected by HAP2, HAP3 and HAP5 than  
723 the traits affected by HAP4 only in *S. cerevisiae* (non-conserved effects) ( $P = 0.035$ ,  
724 one-tailed Fisher's exact test). A total of 78 morphological traits significantly affected

725 by HAP4 deletion in *S. cerevisiae* are examined, among which 24 are conserved effects  
726 and 54 non-conserved effects. Overlaps refer to traits significantly affected by all four  
727 gene deletions in *S. cerevisiae*. Error bars represent SE.

728 **(C):** Proposition of an expanded framework for reverse genetic analysis. Statistically  
729 significant genetic effects defined in conventional framework are further separated into  
730 evolutionarily selected and *ad hoc* ones, with the former supporting related  
731 biochemistry understandings and the latter being pleiotropic and decoupled from the  
732 gene's normal functions.

A

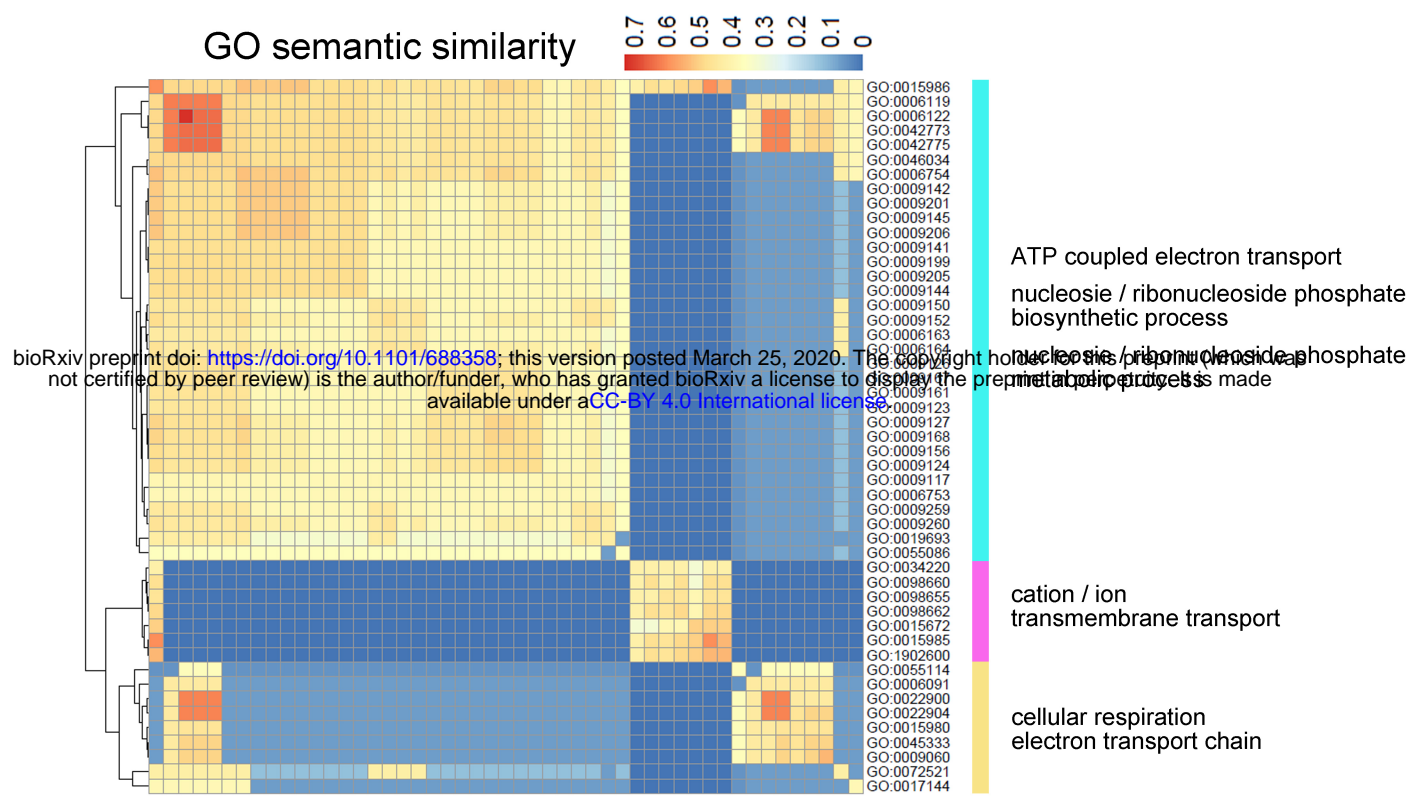

B

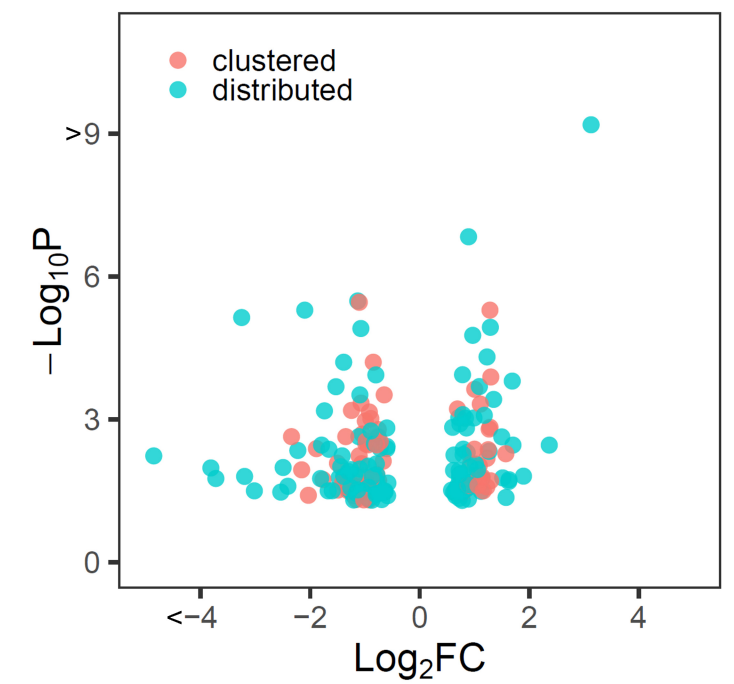

C

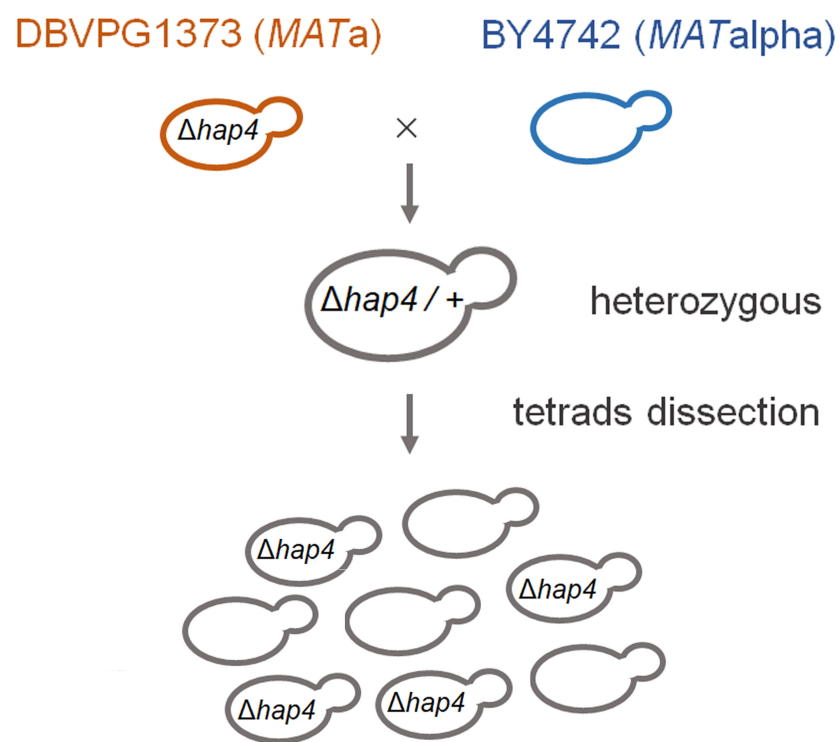

D

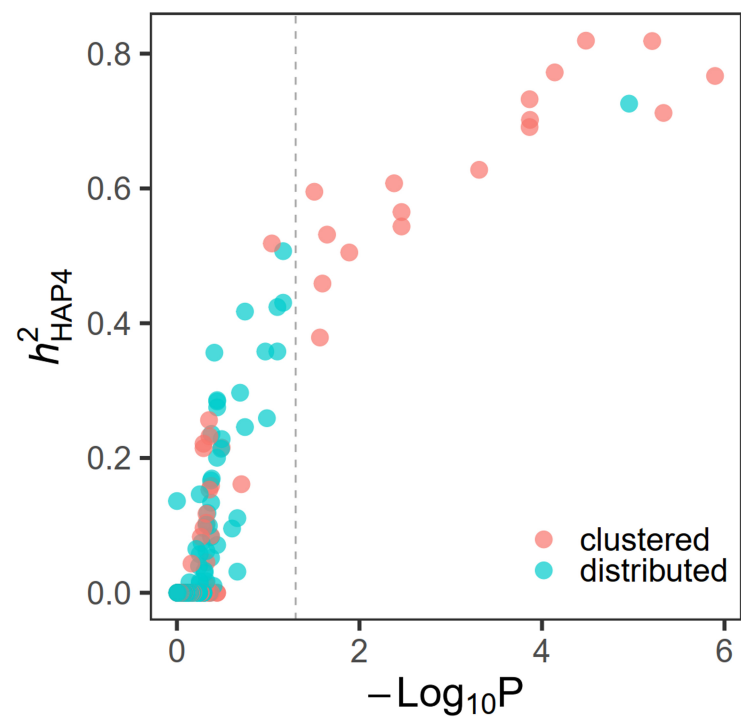

E

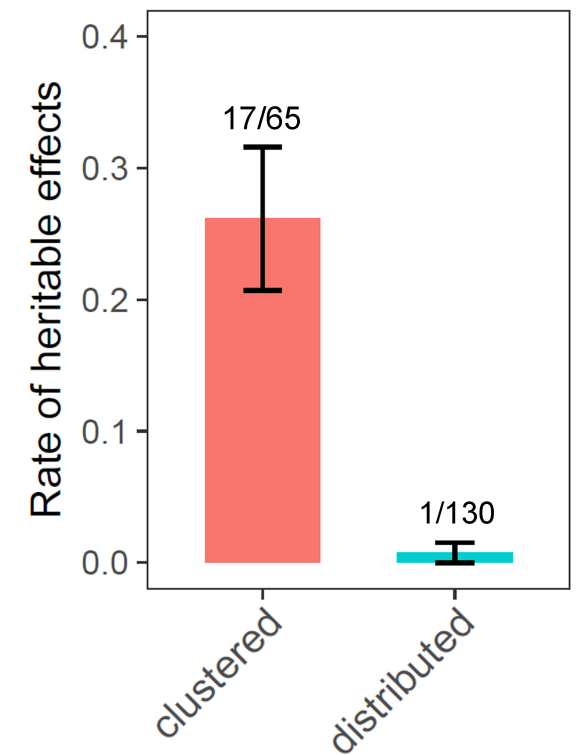

F

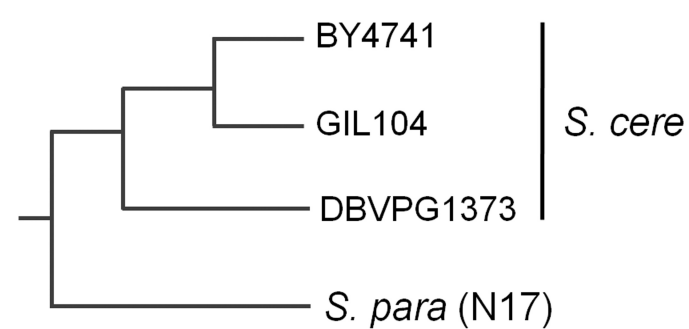

G

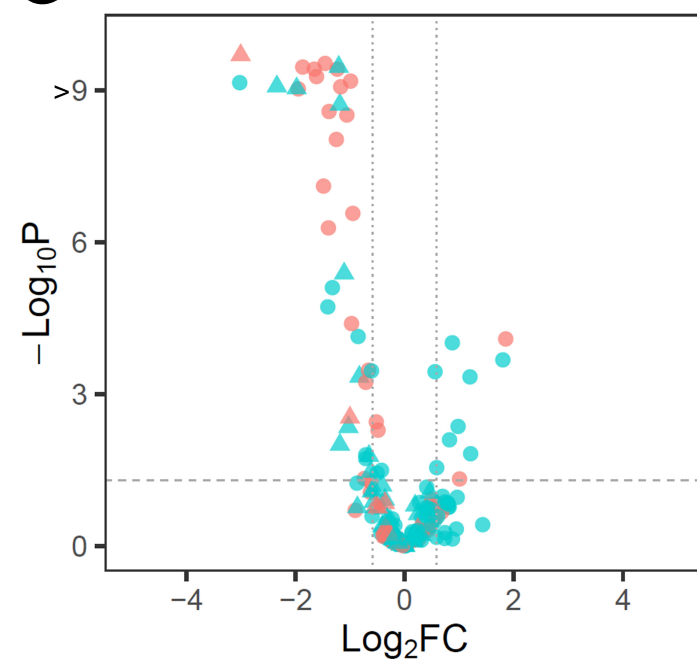

H

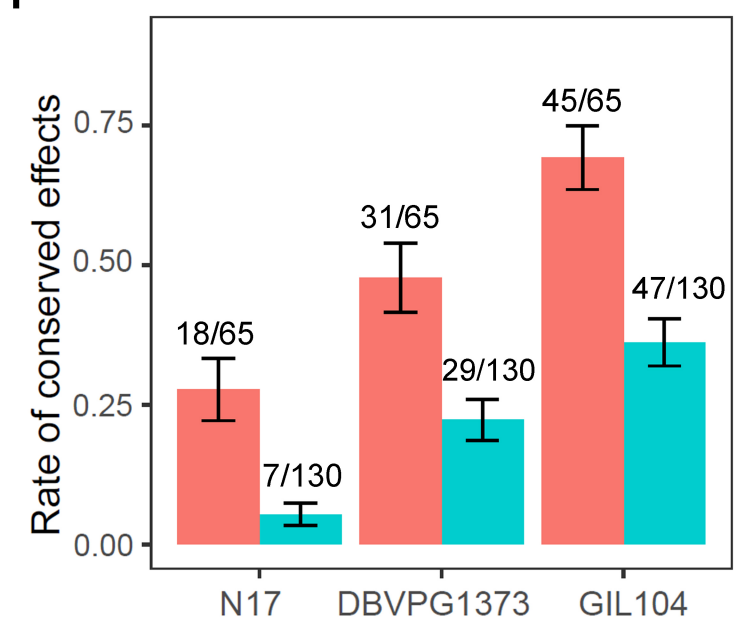

Fig. 1

● down-regulated clustered effects      ▲ up-regulated clustered effects  
● down-regulated distributed effects      ▲ up-regulated distributed effects

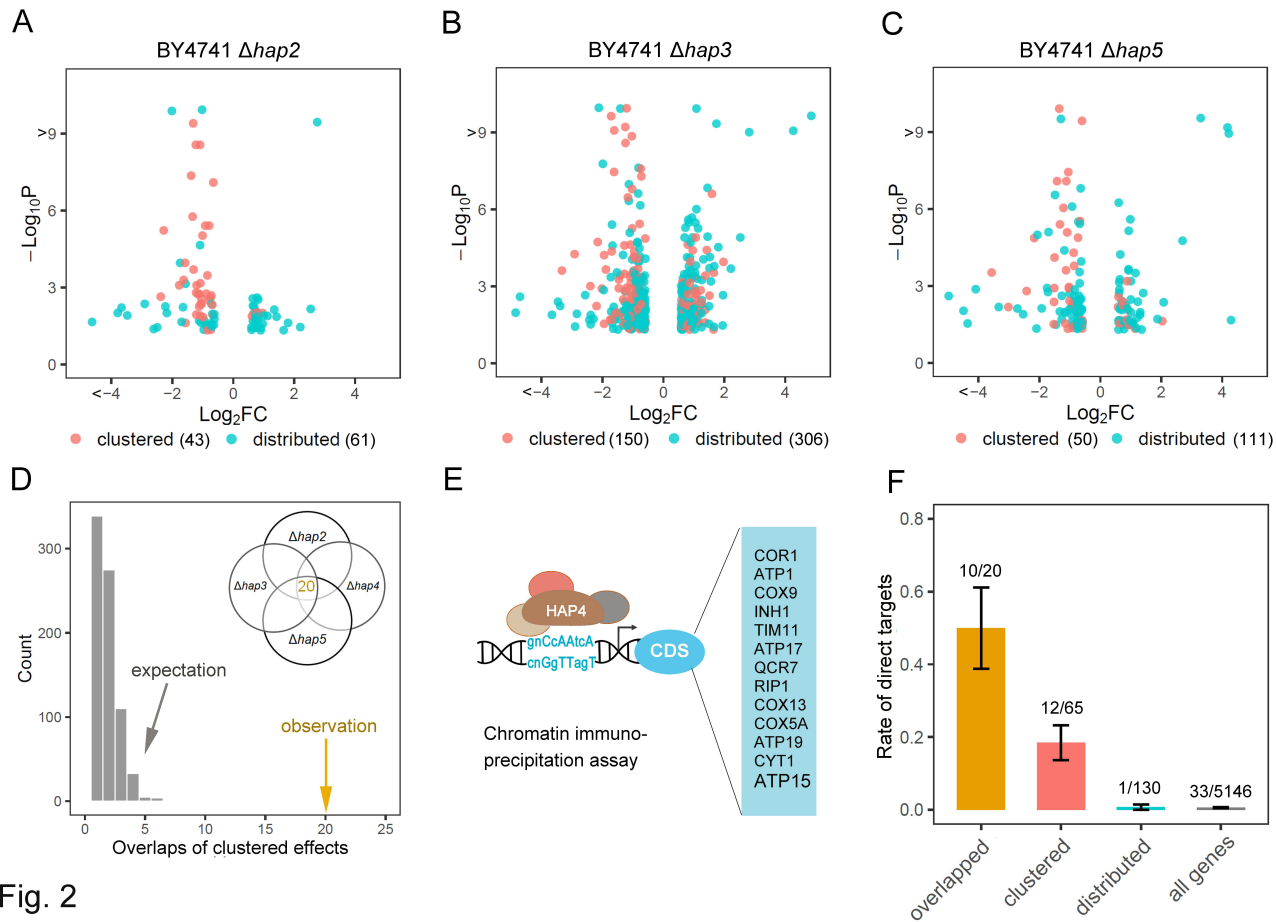

**Fig. 2**

## Box 1

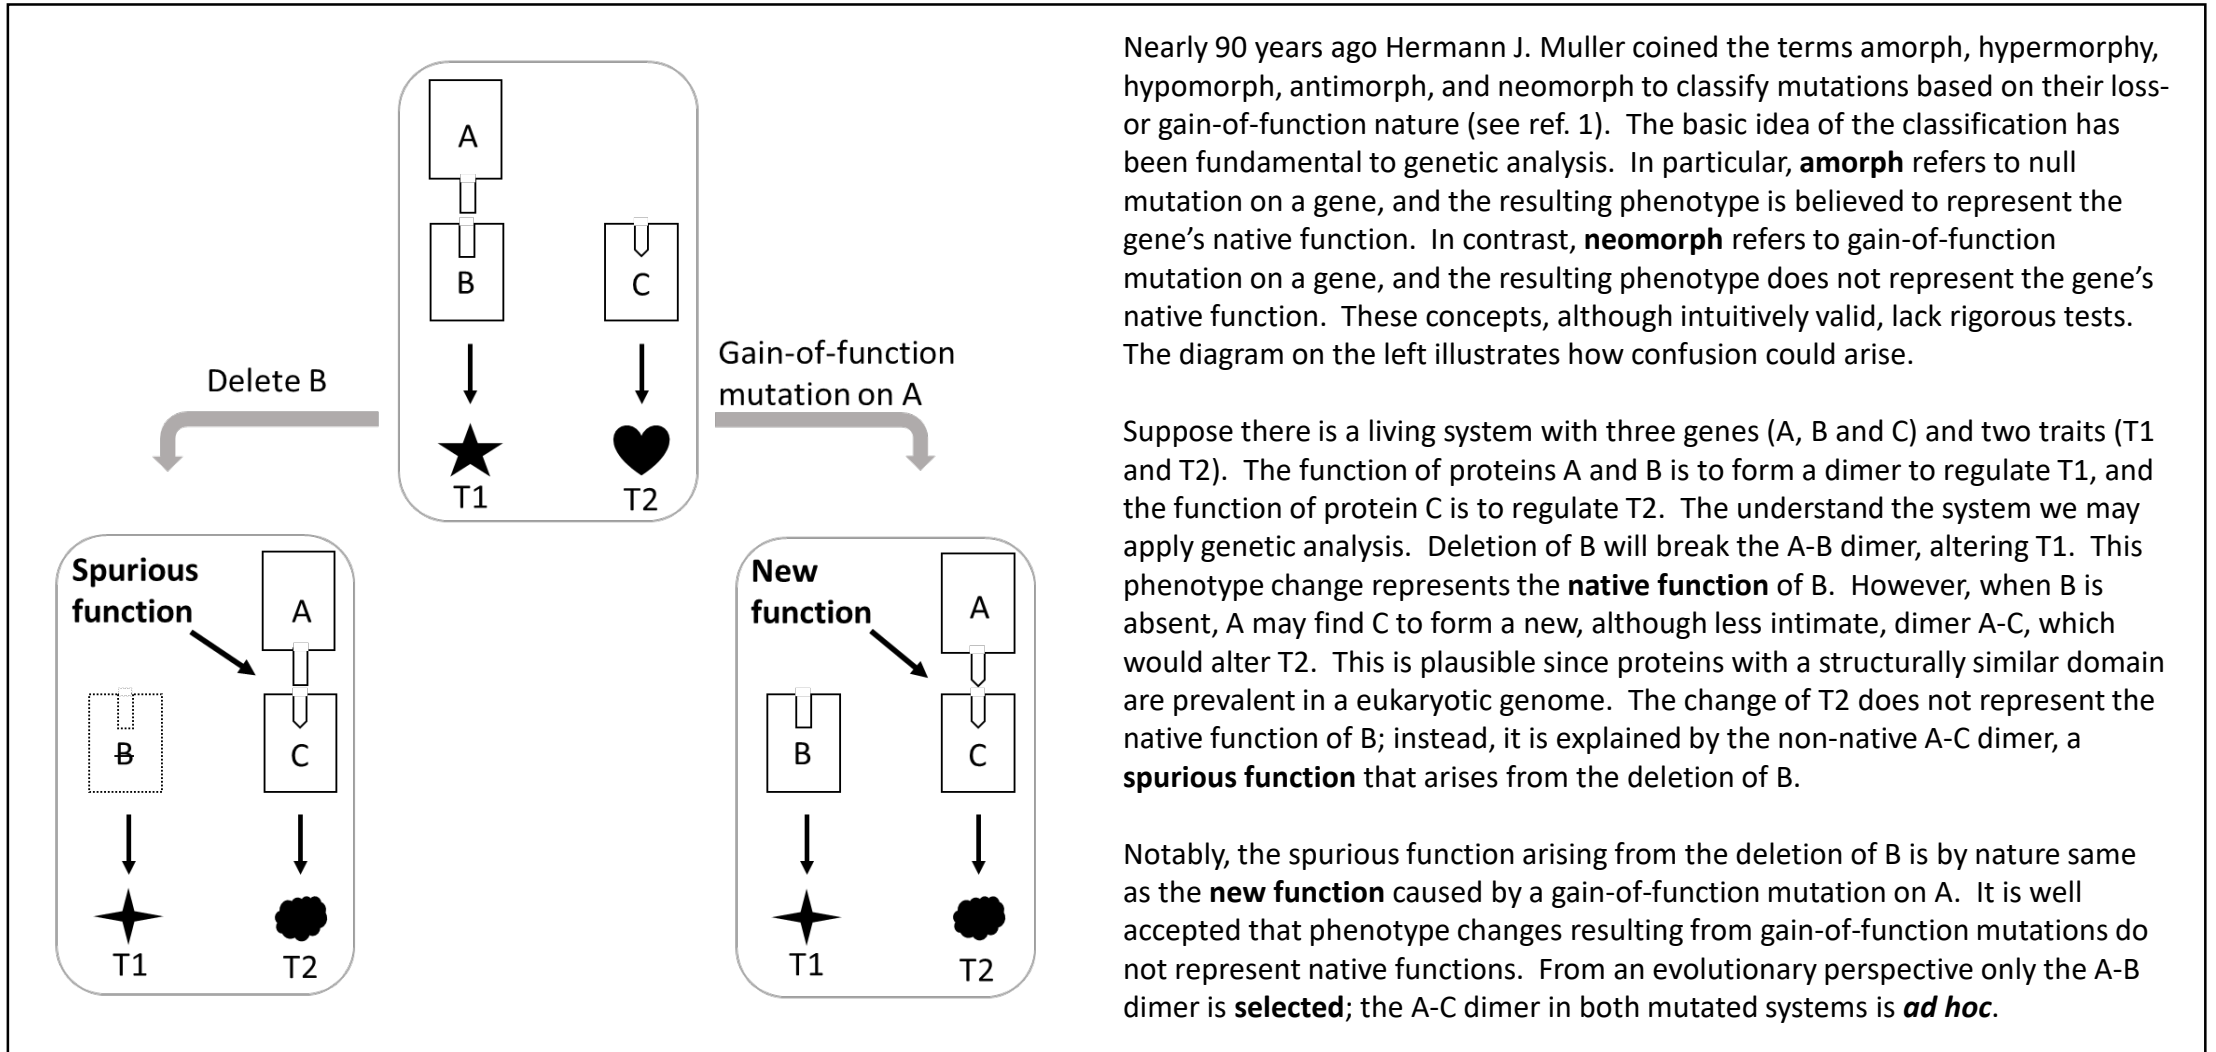

Nearly 90 years ago Hermann J. Muller coined the terms amorph, hypermorph, hypomorph, antimorph, and neomorph to classify mutations based on their loss- or gain-of-function nature (see ref. 1). The basic idea of the classification has been fundamental to genetic analysis. In particular, **amorph** refers to null mutation on a gene, and the resulting phenotype is believed to represent the gene's native function. In contrast, **neomorph** refers to gain-of-function mutation on a gene, and the resulting phenotype does not represent the gene's native function. These concepts, although intuitively valid, lack rigorous tests. The diagram on the left illustrates how confusion could arise.

Suppose there is a living system with three genes (A, B and C) and two traits (T1 and T2). The function of proteins A and B is to form a dimer to regulate T1, and the function of protein C is to regulate T2. To understand the system we may apply genetic analysis. Deletion of B will break the A-B dimer, altering T1. This phenotypic change represents the **native function** of B. However, when B is absent, A may find C to form a new, although less intimate, dimer A-C, which would alter T2. This is plausible since proteins with a structurally similar domain are prevalent in a eukaryotic genome. The change of T2 does not represent the native function of B; instead, it is explained by the non-native A-C dimer, a **spurious function** that arises from the deletion of B.

Notably, the spurious function arising from the deletion of B is by nature same as the **new function** caused by a gain-of-function mutation on A. It is well accepted that phenotypic changes resulting from gain-of-function mutations do not represent native functions. From an evolutionary perspective only the A-B dimer is **selected**; the A-C dimer in both mutated systems is **ad hoc**.



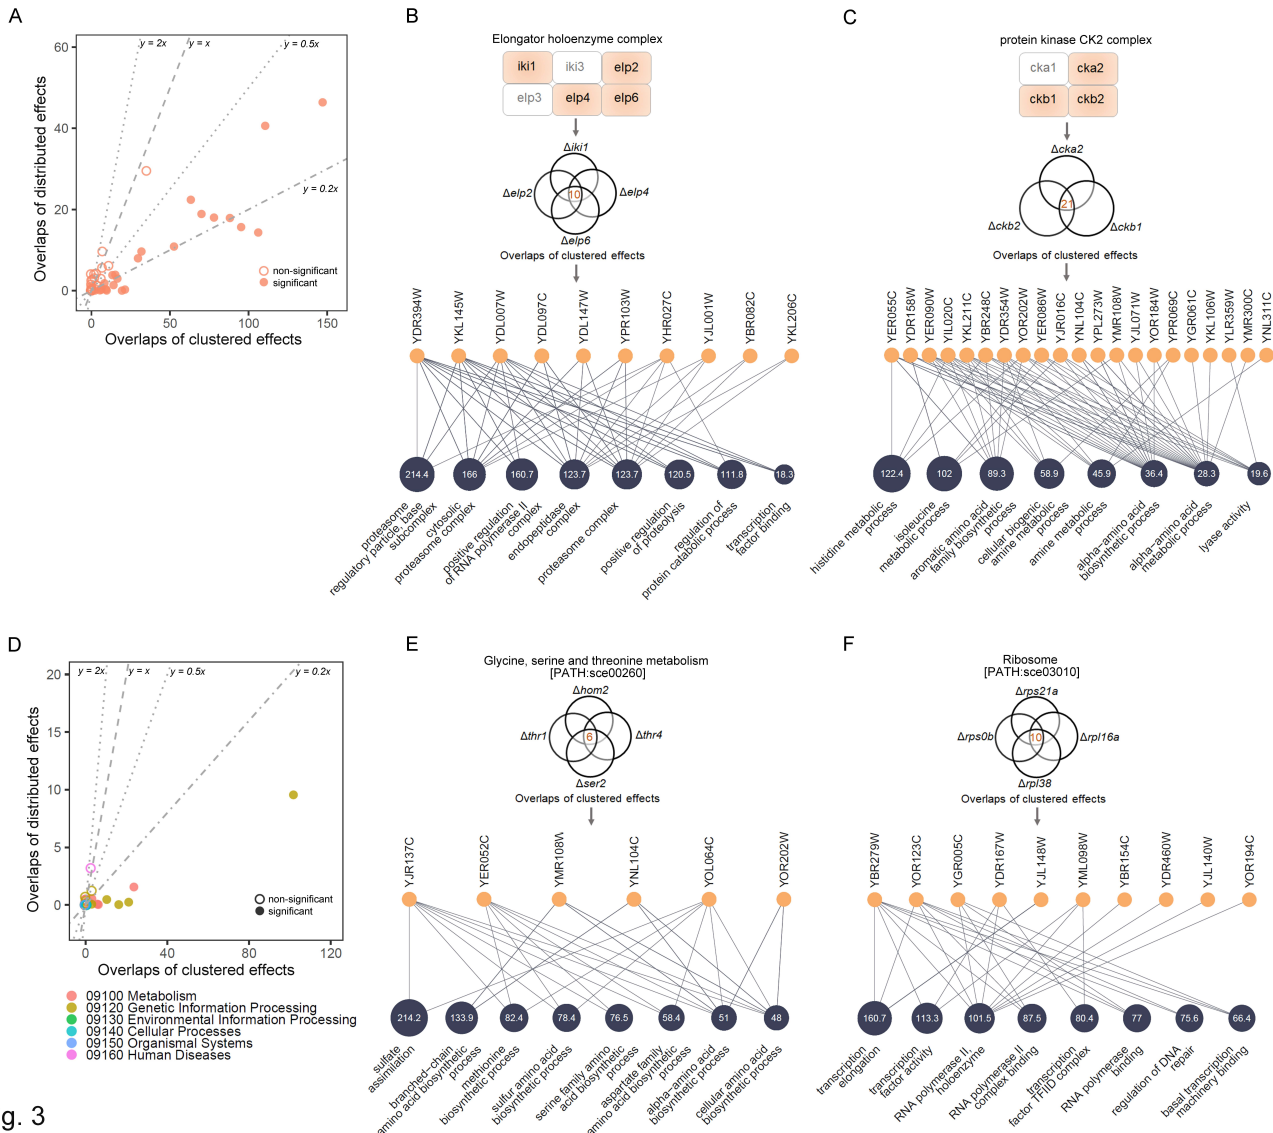

Fig. 3



A

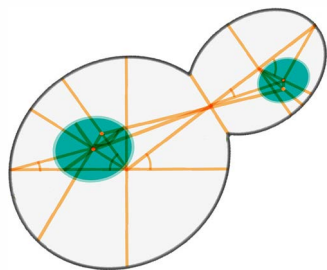

B

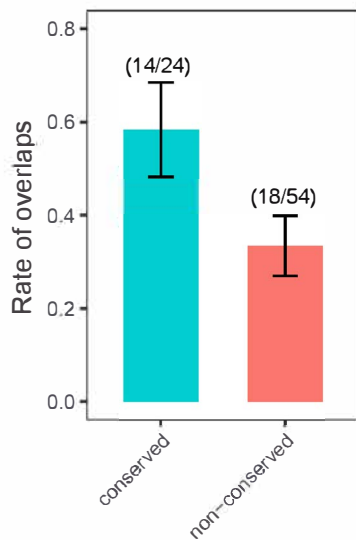

C

An expanded framework for reverse genetics

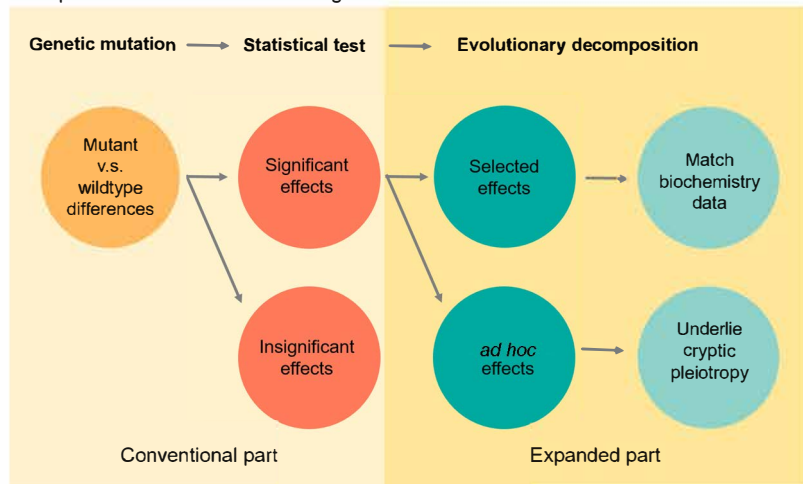

Fig. 4

733

734

## Supporting Information of

735 “Decoupling gene knockout effects from gene functions by evolutionary analyses”

736

737 Li Liu<sup>#</sup>, Mengdi Liu<sup>#</sup>, Di Zhang, Shanjun Deng, Piaopiao Chen, Jing Yang, Yunhan Xie  
738 & Xionglei He\*

739

740 State Key Laboratory of Biocontrol, School of Life Sciences, Sun Yat-sen University,  
741 Guangzhou 510275, China

742

### 743 **This file contains:**

744 Legends of Tables S1 to S8

745 Figs. S1 to S9

746

747

### 748 **Legends of supplementary tables**

749 **Table S1:** RNA-seq-based gene expression levels for each HAP4 deletion and wild-  
750 type strain.

751 **Table S2:** RNA-seq-based expression changes (P-value and FC) of the 195  
752 responsive genes in BY4741( $\Delta hap4$ ) and other deletion lines, with the values of  $h^2_{HAP4}$   
753 also included.

754 **Table S3:** RNA-seq-based gene expression changes after deleting HAP2, HAP3,  
755 HAP4 and HAP5, respectively, in BY4741.

756 **Table S4:** Summary of the analyses of protein complexes in this study.

757 **Table S5:** Summary of the analyses of KEGG pathways in this study.

758 **Table S6:** The affected morphological traits in a variety of gene deletion lines.

759 **Table S7:** Summary of the clustered effects and distributed effects defined in each  
760 mutant that has public microarray data.

761 **Table S8:** Summary of the trait information of each diploid gene deletion or wild-  
762 type yeast strain, with the 405 trait values, the number of examined cells, and the  
763 number of replications included.

764

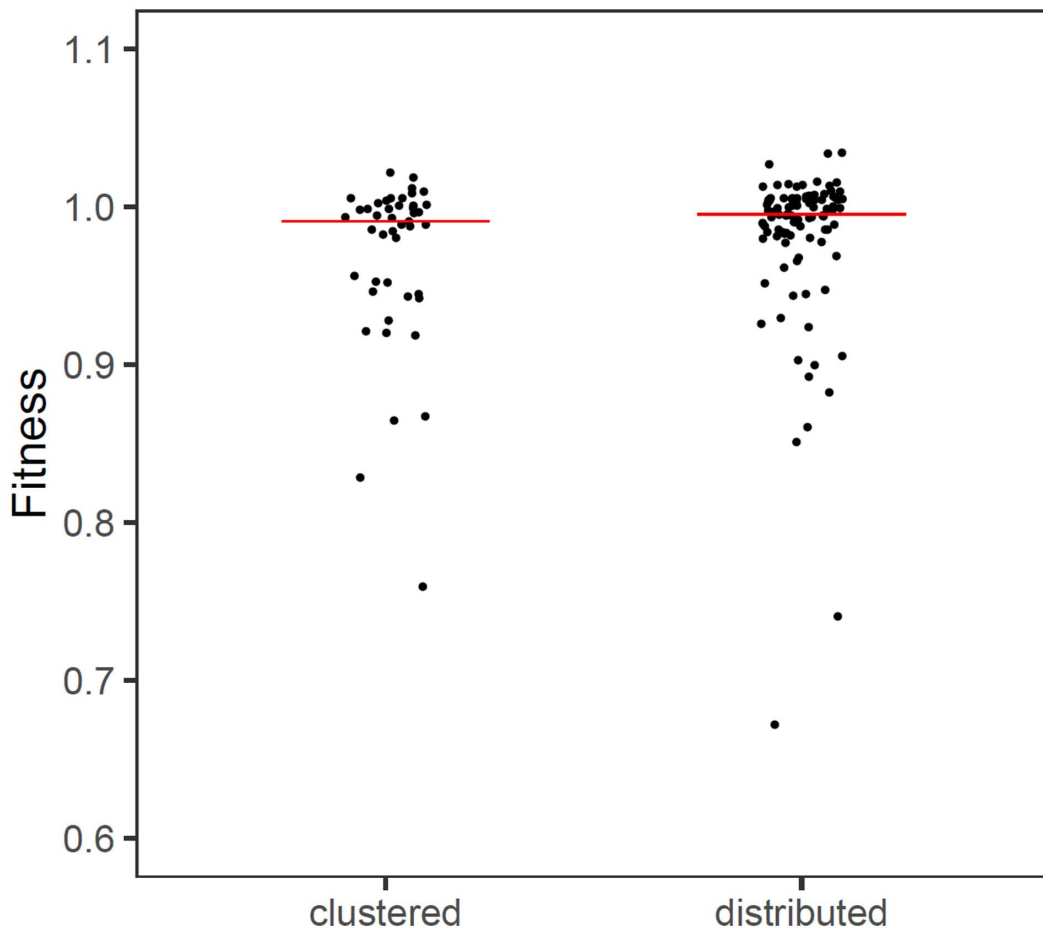

**Fig. S1.** Fitness importance is comparable between the clustered responsive genes and distributed responsive genes defined in BY4741( $\Delta$ hap4) ( $P = 0.10$ , Mann-Whitney U-test). Fitness importance of a gene is measured by the relative growth rate of the gene deletion line to wild-type. The horizontal line shows the median.

A

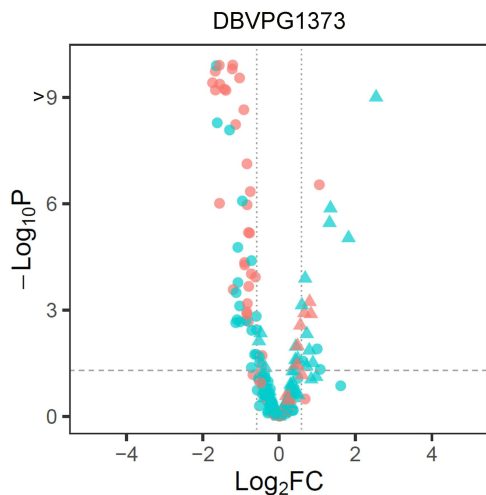

● down-regulated clustered effects  
● down-regulated distributed effects

B

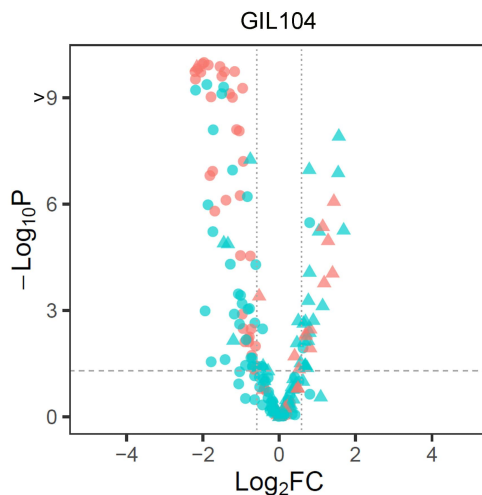

▲ up-regulated clustered effects  
▲ up-regulated distributed effects

**Fig. S2. The intra-species conservation analysis of the HAP4 deletion effects.** The 195 responsive genes defined in BY4741( $\Delta$ hap4) are examined with respect to their expression responses in *S. cerevisiae* DBVPG1373( $\Delta$ hap4) and GIL104( $\Delta$ hap4), respectively. The horizontal dashed line shows adjusted  $P = 0.05$  and vertical dashed lines show  $\log_2FC = \pm 0.58$ . (cyan: clustered effects; red: distributed effects; cycle: down-regulated in BY4741( $\Delta$ hap4); triangle: up-regulated in BY4741( $\Delta$ hap4)).

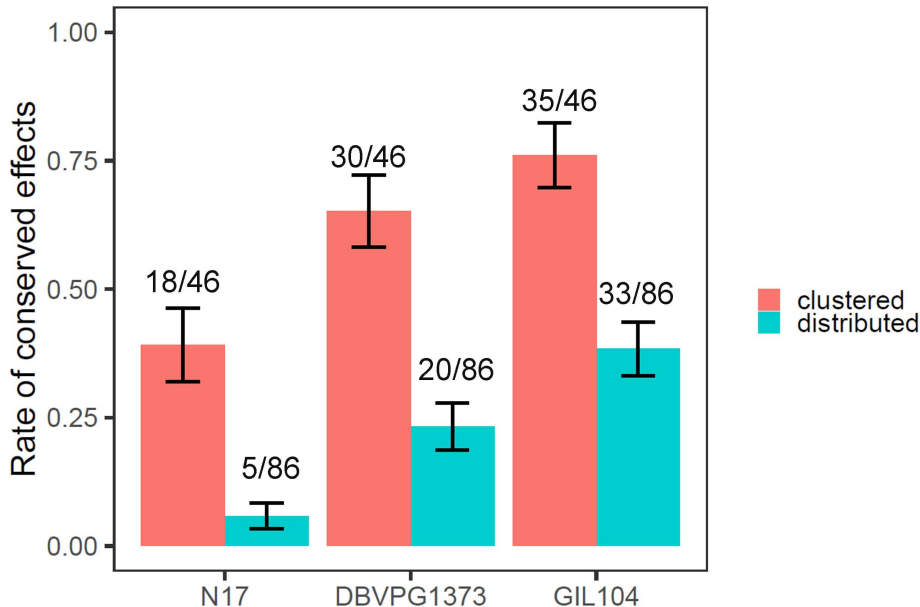

**Fig. S3. Conservation analysis of the HAP4 deletion effects by considering only genes with a strong expression level in wild-type BY4741.** This analysis is to address the concern that lowly expressed genes in wild-type tend not to have detectable down-regulation due to technical bias. Hence, for the 195 responsive genes defined in BY4741( $\Delta$ hap4) only those with  $\log_2$ RPKM > 5 in wild-type BY4741 are considered here, leaving 46 clustered effects and 86 distributed effects. Error bars represent SE.

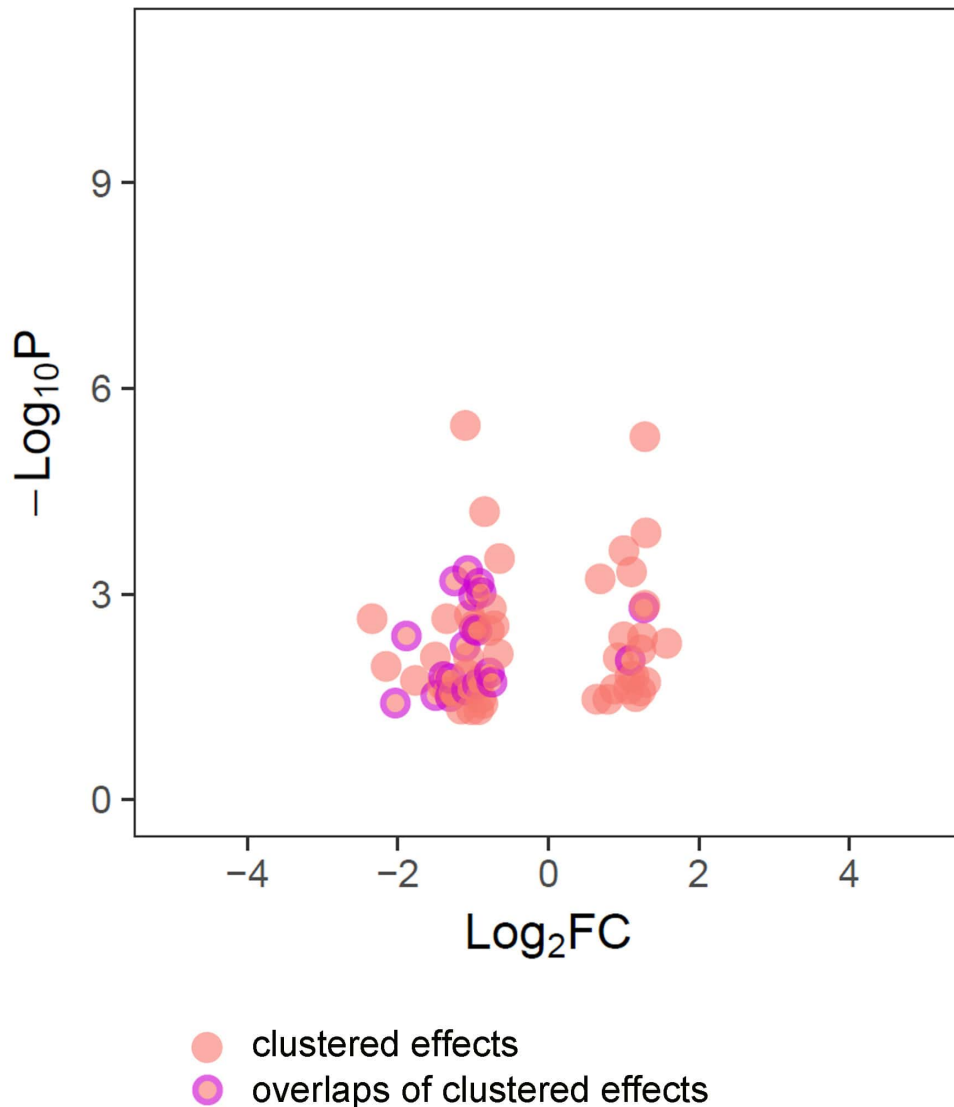

**Fig. S4.** The 20 overlapped clustered effects are comparable to the rest 45 (65-20) clustered effects defined in BY4741( $\Delta\text{hap4}$ ) with regard to their effect size. The differences are not statistically significant for both the P-values and fold changes observed in BY4741( $\Delta\text{hap4}$ ) ( $P = 0.75$  and  $0.51$ , respectively, Mann-Whitney U-test)

A

| Deleted gene | Number of clustered effects | Number of distributed effects |
|--------------|-----------------------------|-------------------------------|
| HAP2         | 46                          | 58                            |
| HAP3         | 140                         | 316                           |
| HAP4         | 70                          | 125                           |
| HAP5         | 53                          | 108                           |

B

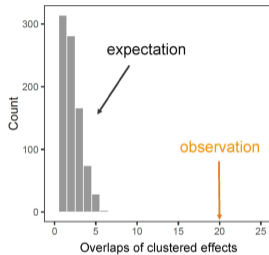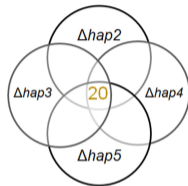

C

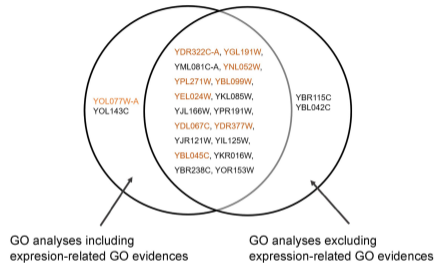

**Fig. S5. The strong overlaps of clustered effects of the HAP2/3/4/5 complex genes are not biased by expression-related GO evidences for annotating the deletion effects.** (A) Only the evidences IDA, HDA and IPI are used to re-define the clustered and distributed deletion effects of the four genes, respectively. (B) There are 20 overlapped clustered effects for the four genes encoding the HAP2/3/4/5 tetramer, which is significantly higher than expectation. The expectation is estimated by random sampling of the distributed effects of the four genes to calculate overlaps, and 1,000 such simulations were conducted. (C) The overlapped clustered effects are largely the same before and after excluding expression-related GO evidences. Genes that are the direct target of HAP4 are highlighted in yellow.

A

| Deleted gene | Number of clustered effects | Number of distributed effects |
|--------------|-----------------------------|-------------------------------|
| HAP2         | 130                         | 173                           |
| HAP3         | 33                          | 41                            |
| HAP4         | 81                          | 119                           |
| HAP5         | 12                          | 39                            |

B

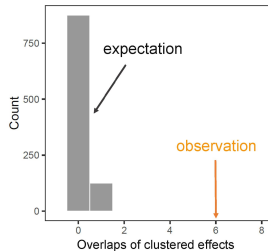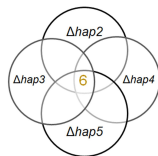

C

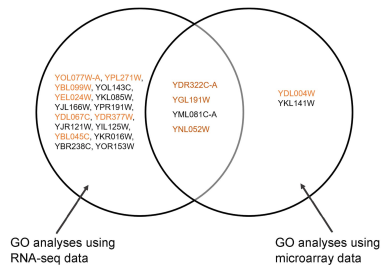

**Fig. S6. The enrichment of overlapped clustered effects in HAP2/3/4/5 complex is reproduced by using public microarray data of the four gene deletion lines.** (A) Microarray-based expression data are used to re-define the clustered and distributed deletion effects of the four genes, respectively. (B) There are only six overlapped clustered effects for the four genes encoding the HAP2/3/4/5 tetramer, which is significantly higher than expectation. The reduced number is primarily due to the small number (12) of clustered effects observed in HAP5 deletion. The expectation is estimated by random sampling of the distributed effects of the four genes to calculate overlaps, and 1,000 such simulations were conducted. (C) Comparison of the six overlapped clustered effects defined using microarray data with the 20 overlapped clustered effects defined using RNA-seq data. Genes that are the direct target of HAP4 are highlighted in yellow.





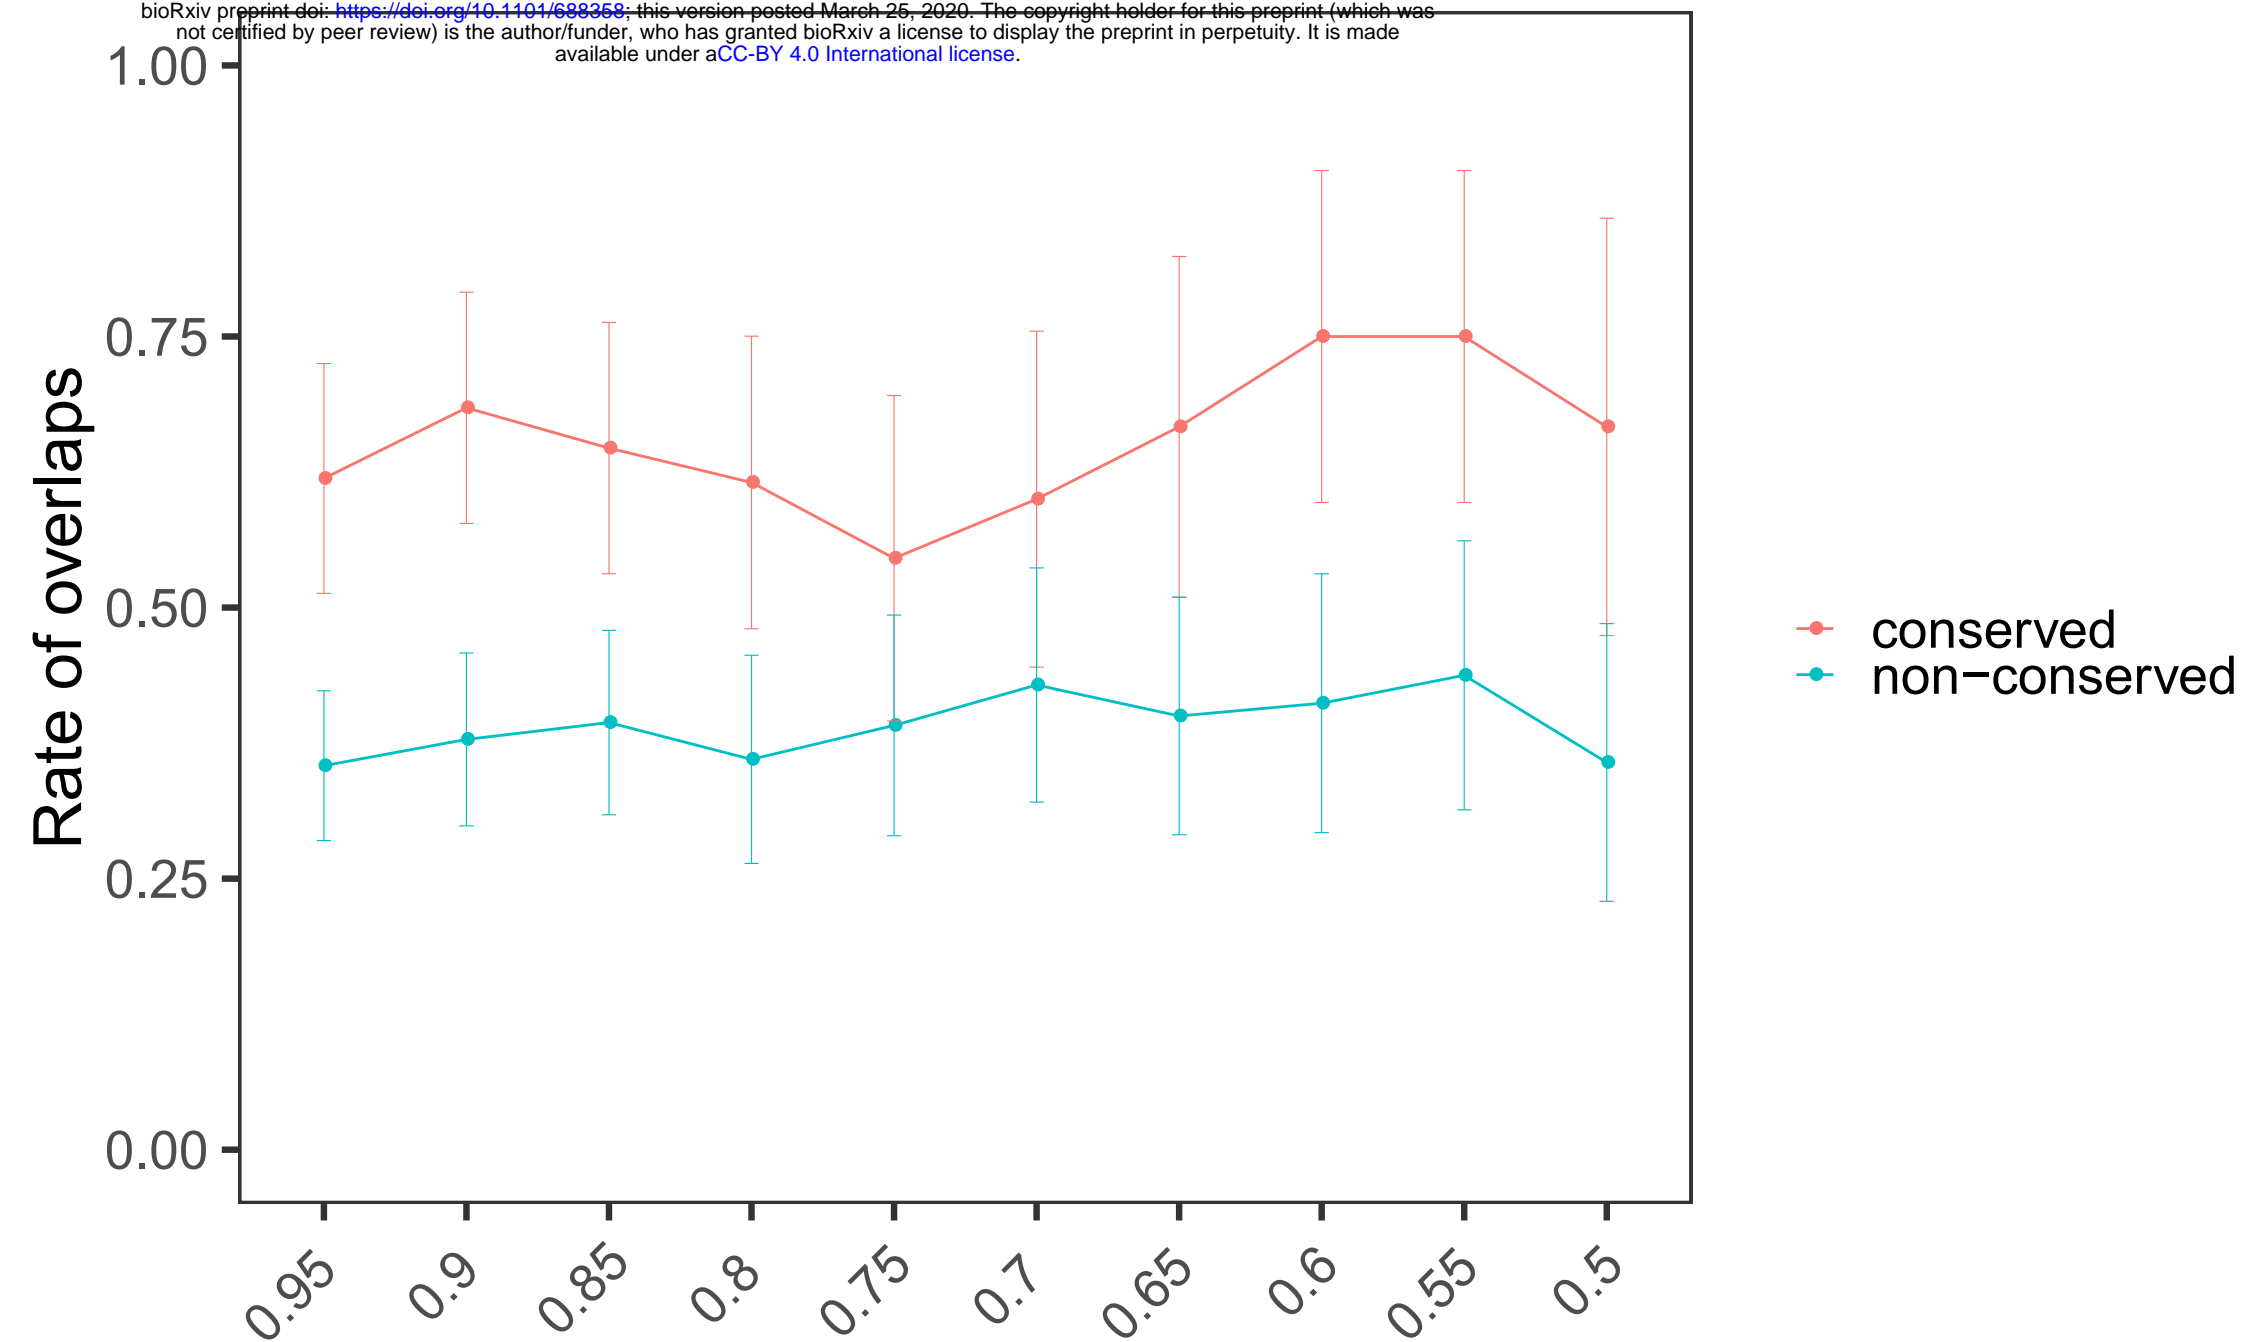

**Fig. S8. The estimated rate of overlaps cannot be explained by correlated traits.** The Pearson's R of all trait pairs is calculated using the trait values generated in ref. 4 for 4,718 yeast mutants. We then removed traits one by one from those with the highest absolute R until no two traits have  $R^2$  greater than a threshold, which is set to be 0.95, 0.9, 0.85, 0.8, 0.75, 0.7, 0.65, 0.6, 0.55, and 0.5, respectively. The number of remaining traits are 346, 312, 277, 247, 223, 204, 185, 161, 153, and 127, respectively. Error bars represent SE.

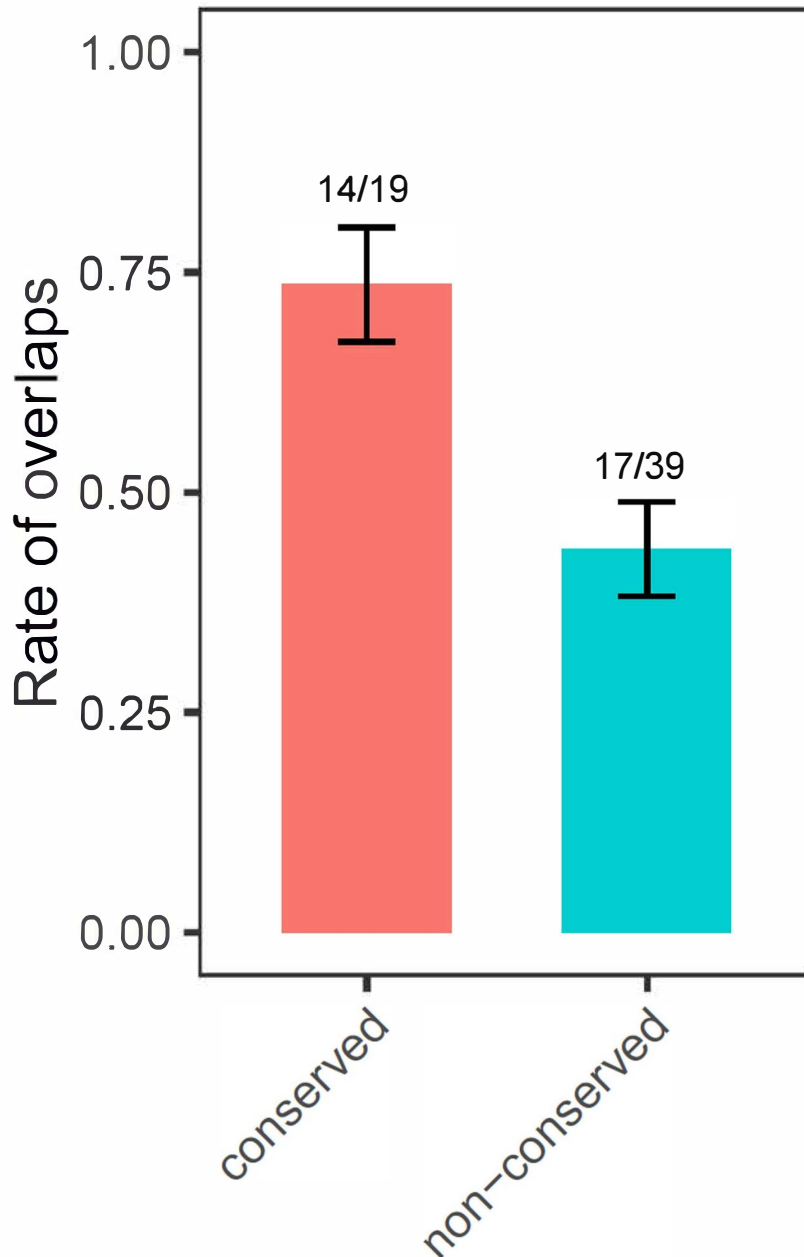

**Fig. S9. The comparison in Fig. 4B is robust against trait measuring noise.** To address the potential technical bias that traits with large measuring noise tend to be both non-conserved and non-overlapping, only traits with measuring CV < 0.1 across the replicates in wild-type BY4741 are considered. This results in 58 traits that are significantly affected by HAP4 deletion in *S. cerevisiae*, among which 19 are conserved effects and 39 non-conserved effects. The rate of overlaps in the conserved set remains significantly higher than the non-conserved set ( $P = 0.029$ , one-tailed Fisher's exact test). Overlaps refer to traits significantly affected by all four gene deletions in *S. cerevisiae*.
